# Supplementary material
Source: MDPI journal article supplement (https://www.mdpi.com/2073-4344/12/11/1381)
Supplement: s1 [file s1]

*Supplementary Material*

# Upgrading mixed agricultural plastic and lignocellulosic waste to liquid fuels by catalytic pyrolysis

Farid Sotoudehnia <sup>1</sup>, Armando G McDonald <sup>1</sup>, \*

<sup>1</sup> Forest and Sustainable Products Program, Department of Forest, Rangeland and Fire Sciences, University of Idaho, Moscow, ID 83844, USA

\* Correspondence: armandm@uidaho.edu; Tel.: +1-208-885-9454

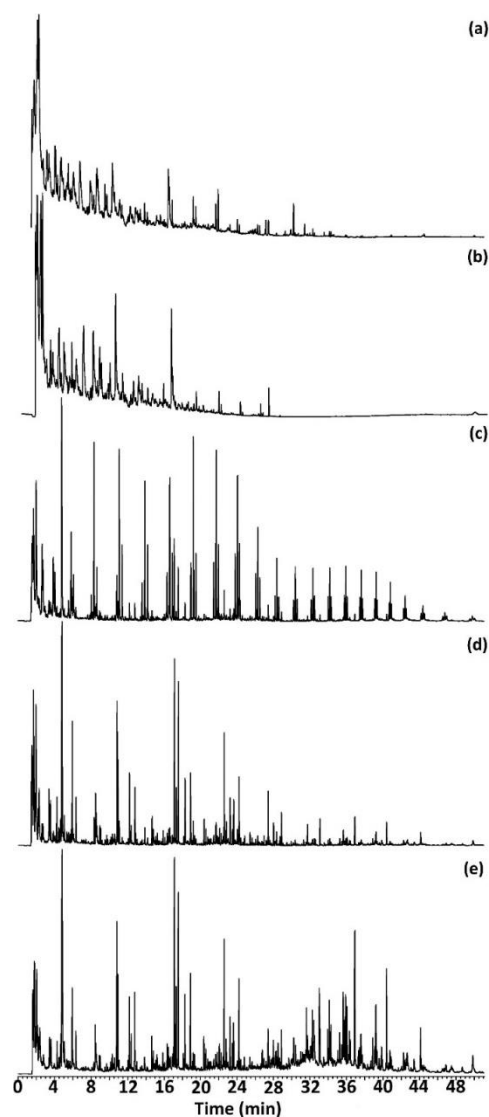

**Figure S1.** Py-GC-MS chromatograms at 500 °C of (a) bluegrass (BG), (b) chaff, (c) net wrap (NW), (d) twine 1 (T1), and (e) twine 2 (T2).

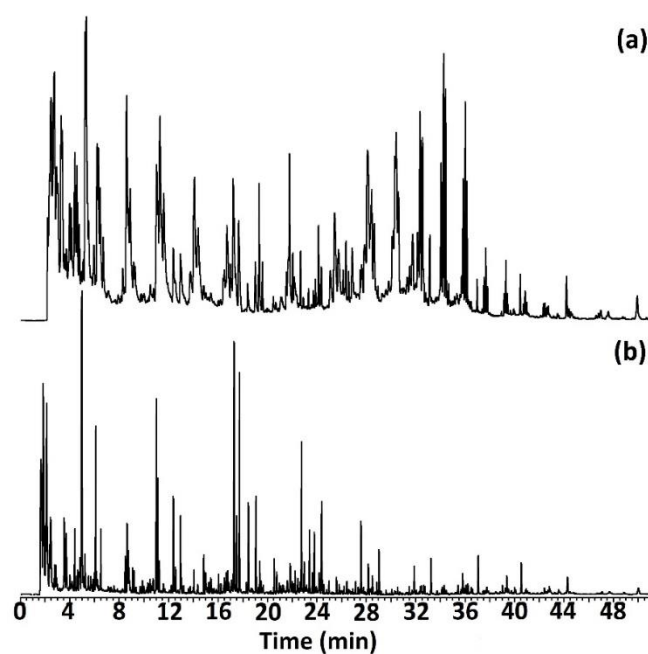

**Figure S2.** Py-GC-MS chromatograms at 500 °C of (a) bluegrass-mixed plastic (BMP) and (b) chaff-mixed plastic (CMP).

**Table S1.** Py-GC-MS products identified from chaff, bluegrass (BG), net wrap (NW), twine 1 (T1), twine 2 (T2), chaff mixed plastic (CMP), bluegrass mixed plastic (BMP) at 500 °C.

| Compound Name                                                         | Formula                                      | M <sup>+</sup> | RT    | Chaff | BG    | NW   | T1       | T2   | CMP  | BMP  |
|-----------------------------------------------------------------------|----------------------------------------------|----------------|-------|-------|-------|------|----------|------|------|------|
|                                                                       |                                              | (m/z)          | (min) |       |       |      | Area (%) |      |      |      |
| Carbon dioxide                                                        | CO <sub>2</sub>                              | 44             | 1.58  | 3.14  | 11.21 | 4.28 | -        | -    | 0.81 | 0.99 |
| Propene                                                               | C <sub>3</sub> H <sub>6</sub>                | 42             | 1.6   | -     | -     | -    | 6.03     | 3.34 | -    | -    |
| Cyclobutane                                                           | C <sub>4</sub> H <sub>8</sub>                | 56             | 1.63  | -     | -     | -    | -        | -    | -    | 1.3  |
| Pentane                                                               | C <sub>5</sub> H <sub>12</sub>               | 72             | 1.77  | -     | -     | 4.1  | 6.03     | 3.24 | 2.62 | -    |
| Cyclopropyl carbinol                                                  | C <sub>4</sub> H <sub>8</sub> O              | 72             | 1.82  | 13.8  | 13.2  | -    | -        | -    | -    | 3.38 |
| 2-methyl-pentane                                                      | C <sub>6</sub> H <sub>14</sub>               | 86             | 1.97  | -     | -     | -    | 1.17     | -    | -    | -    |
| Cyclohexane                                                           | C <sub>6</sub> H <sub>12</sub>               | 84             | 2.04  | -     | -     | -    | 4.86     | -    | -    | -    |
| 2-methyl-1-pentene                                                    | C <sub>6</sub> H <sub>12</sub>               | 84             | 2.05  | -     | -     | 4.94 | -        | 2.26 | -    | 4.77 |
| Acetic acid                                                           | C <sub>2</sub> H <sub>4</sub> O <sub>2</sub> | 60             | 2.23  | 17.5  | 11.2  | -    | -        | -    | -    | -    |
| 1-Hexene                                                              | C <sub>6</sub> H <sub>12</sub>               | 84             | 2.28  | -     | -     | -    | 0.98     | 0.41 | 3.82 | 2.38 |
| 1-hydroxy-2-propanone,<br>(Z),(Z)-2,4-Hexadiene                       | C <sub>3</sub> H <sub>6</sub> O <sub>2</sub> | 74             | 2.34  | 13.1  | 7.94  | -    | -        | -    | 1.38 | -    |
|                                                                       | C <sub>6</sub> H <sub>10</sub>               | 82             | 2.36  | -     | -     | -    | 2.2      | 0.65 | -    | -    |
| 5-methyl-1-hexyne                                                     | C <sub>7</sub> H <sub>12</sub>               | 96             | 2.47  | -     | -     | -    | -        | 1.39 | -    | -    |
| 1-Heptene                                                             | C <sub>7</sub> H <sub>14</sub>               | 98             | 2.69  | -     | -     | 1.82 | 0.52     | -    | 1.55 | 1.07 |
| Propanoic acid                                                        | C <sub>3</sub> H <sub>6</sub> O <sub>2</sub> | 74             | 2.8   | 1.52  | 0.88  | -    | -        | -    | -    | -    |
| Heptane                                                               | C <sub>7</sub> H <sub>16</sub>               | 100            | 2.81  | -     | -     | 1.7  | 0.6      | 0.38 | -    | 1.33 |
| 3-methyl-4-penten-1-ol                                                | C <sub>6</sub> H <sub>12</sub> O             | 100            | 2.91  | -     | -     | -    | -        | -    | 1.06 | -    |
| 4-methyl-1-penten-3-ol                                                | C <sub>6</sub> H <sub>12</sub> O             | 100            | 3.24  | 1.89  | 2.38  | -    | -        | -    | 1    | 0.44 |
| Toluene                                                               | C <sub>7</sub> H <sub>8</sub>                | 92             | 3.45  | 1.75  | 1.17  | -    | -        | -    | -    | 0.88 |
| 4-methyl-3-heptene                                                    | C <sub>8</sub> H <sub>16</sub>               | 112            | 3.47  | -     | -     | -    | 1.63     | 0.72 | 1.26 | -    |
| 1-(1,1-dimethylethyl)-2-methylene-<br>cyclopropane,<br>(Z)-3-Octene   | C <sub>8</sub> H <sub>14</sub>               | 110            | 3.62  | -     | -     | -    | 1.25     | 0.76 | 0.27 | 0.66 |
|                                                                       | C <sub>8</sub> H <sub>16</sub>               | 112            | 3.92  | -     | -     | 1.75 | 0.27     | -    | 1.64 | 1.06 |
| 2-Cyclopenten-1-one                                                   | C <sub>5</sub> H <sub>6</sub> O              | 82             | 4.11  | 3.14  | 1.47  | -    | -        | -    | -    | -    |
| Octane                                                                | C <sub>8</sub> H <sub>18</sub>               | 114            | 4.11  | -     | -     | 1.21 | -        | -    | 1.34 | 0.98 |
| 2,2-Dimethyl-3-heptene trans                                          | C <sub>9</sub> H <sub>18</sub>               | 126            | 4.3   | -     | -     | 0.24 | -        | -    | -    | 0.5  |
| 2,6-dimethyl-3-heptene                                                | C <sub>9</sub> H <sub>18</sub>               | 126            | 4.32  | -     | -     | -    | 1.23     | 0.57 | 0.58 | -    |
| Furfural                                                              | C <sub>5</sub> H <sub>4</sub> O <sub>2</sub> | 96             | 4.4   | 0.72  | 2.12  | -    | -        | -    | -    | -    |
| 1,2,4-trimethyl-(1 $\alpha$ ,2 $\beta$ ,4 $\beta$ )-cyclohexane       | C <sub>9</sub> H <sub>18</sub>               | 126            | 4.54  | -     | -     | -    | 0.4      | -    | 0.33 | -    |
| 1,3,5-trimethyl-cyclohexane                                           | C <sub>9</sub> H <sub>18</sub>               | 126            | 4.67  | -     | -     | -    | 0.41     | -    | -    | 0.29 |
| 2-Furanmethanol                                                       | C <sub>5</sub> H <sub>6</sub> O <sub>2</sub> | 98             | 4.7   | 1.12  | 3.19  | -    | -        | -    | -    | -    |
| 4,4,5-trimethyl-2-hexene                                              | C <sub>9</sub> H <sub>18</sub>               | 126            | 4.74  | -     | -     | -    | 0.71     | 0.72 | -    | -    |
| 3-Furanmethanol                                                       | C <sub>5</sub> H <sub>6</sub> O <sub>2</sub> | 98             | 4.81  | 2.21  | -     | -    | -        | -    | -    | -    |
| 2,4-Dimethyl-1-heptene                                                | C <sub>9</sub> H <sub>18</sub>               | 126            | 4.86  | -     | -     | 5.68 | -        | -    | 2.43 | 5.3  |
| 2,3-Dimethyl-3-heptene                                                | C <sub>9</sub> H <sub>18</sub>               | 126            | 4.92  | -     | -     | -    | 9.36     | 6.91 | -    | -    |
| 1,3,5-trimethyl-(1 $\alpha$ ,3 $\alpha$ ,5 $\beta$ )-<br>cyclohexane, | C <sub>9</sub> H <sub>18</sub>               | 126            | 5.15  | -     | -     | -    | 0.51     | 0.39 | 0.51 | 0.64 |
| p-Xylene                                                              | C <sub>8</sub> H <sub>10</sub>               | 106            | 5.19  | 0.30  | 0.84  | -    | -        | -    | -    | -    |
| 3,3,5-trimethyl-cyclohexene                                           | C <sub>9</sub> H <sub>16</sub>               | 124            | 5.42  | -     | -     | -    | 0.24     | 0.19 | -    | -    |
| 2-methyl-2-cyclopenten-1-one                                          | C <sub>6</sub> H <sub>8</sub> O              | 96             | 5.57  | 0.86  | 1.16  | -    | -        | -    | -    | -    |
| Cyclononene                                                           | C <sub>9</sub> H <sub>16</sub>               | 124            | 5.61  | -     | -     | 0.6  | 0.27     | 0.14 | -    | 0.25 |
| Acetylfuran                                                           | C <sub>6</sub> H <sub>6</sub> O <sub>2</sub> | 110            | 5.78  | 0.36  | 0.43  | -    | -        | -    | -    | -    |
| 1-Nonene                                                              | C <sub>9</sub> H <sub>18</sub>               | 126            | 5.99  | -     | -     | 1.84 | 0.28     | -    | 2.62 | -    |

| Compound Name                                                                     | Formula                                        | M <sup>+</sup><br>(m/z) | RT<br>(min) | Chaff | BG   | NW   | T1   | T2   | CMP  | BMP  |
|-----------------------------------------------------------------------------------|------------------------------------------------|-------------------------|-------------|-------|------|------|------|------|------|------|
| Area (%)                                                                          |                                                |                         |             |       |      |      |      |      |      |      |
| Nonane                                                                            | C <sub>9</sub> H <sub>20</sub>                 | 128                     | 5.86        | -     | -    | 0.89 | -    | -    | 1.14 | 0.81 |
| 1-Methylpentyl cyclopropane                                                       | C <sub>9</sub> H <sub>18</sub>                 | 126                     | 5.88        | -     | -    | -    | -    | -    | 1.4  | -    |
| (E)-2-Nonene                                                                      | C <sub>9</sub> H <sub>18</sub>                 | 126                     | 6.14        | 0.74  | -    | -    | -    | -    | 0.95 | -    |
| 2-hydroxy-2-cyclopenten-1-one                                                     | C <sub>5</sub> H <sub>6</sub> O <sub>2</sub>   | 98                      | 6.29        | 1.65  | 2.58 | -    | -    | -    | 0.45 | -    |
| 2,6-dimethyl-(Z)-1,6-octadiene                                                    | C <sub>10</sub> H <sub>18</sub>                | 138                     | 6.32        | -     | -    | 0.28 | -    | 0.6  | 0.5  | 0.35 |
| 2,2-dimethyl-3-octene                                                             | C <sub>10</sub> H <sub>20</sub>                | 140                     | 6.13        | -     | -    | -    | 0.23 | 0.15 | -    | -    |
| 1,2,3,4,5-pentamethyl-cyclopentane                                                | C <sub>10</sub> H <sub>20</sub>                | 140                     | 6.41        | -     | -    | 0.66 | 2.76 | 1.47 | -    | 1.83 |
| 1,9-Decadiene                                                                     | C <sub>10</sub> H <sub>18</sub>                | 138                     | 6.86        | -     | -    | -    | 0.96 | -    | 0.32 | -    |
| 5-methyl-2-furaldehyde                                                            | C <sub>6</sub> H <sub>6</sub> O <sub>2</sub>   | 110                     | 7.99        | 3.61  | 4.5  | -    | -    | -    | -    | 0.26 |
| Phenol                                                                            | C <sub>6</sub> H <sub>6</sub> O                | 94                      | 8.27        | 2.5   | 5.08 | -    | -    | -    | -    | -    |
| 3-Heptenoic acid                                                                  | C <sub>7</sub> H <sub>12</sub> O <sub>2</sub>  | 128                     | 8.36        | 0.72  | -    | -    | -    | -    | -    | -    |
| 1-Decene                                                                          | C <sub>10</sub> H <sub>20</sub>                | 140                     | 8.39        | -     | -    | 3.53 | 0.52 | 0.14 | 3.5  | 2.54 |
| 2-methyl-3-methylene-nonane                                                       | C <sub>11</sub> H <sub>22</sub>                | 154                     | 8.54        | -     | -    | 0.23 | 0.98 | 0.7  | -    | -    |
| 4-methyl-(Z)-2-decene,                                                            | C <sub>11</sub> H <sub>22</sub>                | 154                     | 8.63        | -     | -    | -    | 0.6  | 0.38 | -    | -    |
| 7-methyl-(Z)-2-decene,                                                            | C <sub>11</sub> H <sub>22</sub>                | 154                     | 8.69        | -     | -    | 1.12 | 0.28 | 0.24 | -    | 1.04 |
| 3-methyl-1,2-cyclopentanedione                                                    | C <sub>6</sub> H <sub>8</sub> O <sub>2</sub>   | 112                     | 8.71        | 2.59  | 2.7  | -    | -    | -    | -    | -    |
| 4,6,8-trimethyl-1-nonene                                                          | C <sub>12</sub> H <sub>24</sub>                | 168                     | 8.75        | -     | -    | -    | 0.14 | 0.12 | 1.44 | -    |
| 2,3-dimethyl-2-cyclopenten-1-one                                                  | C <sub>7</sub> H <sub>10</sub> O               | 110                     | 8.83        | 1.35  | 0.93 | -    | -    | -    | -    | -    |
| 4-methyl-decane                                                                   | C <sub>11</sub> H <sub>24</sub>                | 156                     | 8.99        | -     | -    | 0.17 | 0.06 | 0.21 | -    | 0.1  |
| 2,6-dimethyl-nonane                                                               | C <sub>11</sub> H <sub>24</sub>                | 156                     | 9.01        | -     | -    | -    | 0.35 | 0.21 | -    | -    |
| Undecane                                                                          | C <sub>11</sub> H <sub>24</sub>                | 156                     | 9.13        | -     | -    | -    | 0.32 | 0.12 | 0.32 | 0.09 |
| Acetophenone                                                                      | C <sub>8</sub> H <sub>8</sub> O                | 120                     | 9.59        | 1.11  | -    | -    | -    | -    | -    | -    |
| (Z)-6-Dodecene                                                                    | C <sub>12</sub> H <sub>24</sub>                | 168                     | 9.79        | -     | -    | -    | 0.19 | -    | 0.4  | -    |
| o-Cresol                                                                          | C <sub>7</sub> H <sub>8</sub> O                | 108                     | 9.8         | 0.91  | 1.75 | -    | -    | -    | -    | -    |
| (Z)-3-Dodecene                                                                    | C <sub>12</sub> H <sub>24</sub>                | 168                     | 9.91        | -     | -    | -    | 0.11 | -    | 0.21 | -    |
| Guaiacol                                                                          | C <sub>7</sub> H <sub>8</sub> O <sub>2</sub>   | 124                     | 10.4        | 3.28  | 5.07 | -    | -    | -    | -    | -    |
| 2,2-dimethyl-(E)-3-decene                                                         | C <sub>12</sub> H <sub>24</sub>                | 168                     | 10.41       | -     | -    | -    | 0.37 | 0.33 | 0.16 | -    |
| 1-phenyl-1,2-butanediol                                                           | C <sub>10</sub> H <sub>14</sub> O <sub>2</sub> | 166                     | 10.64       | 0.81  | -    | -    | -    | -    | -    | -    |
| 2,6,6-trimethyl-[1R-(1 $\alpha$ ,2 $\alpha$ ,5 $\alpha$ )]-bicyclo[3.1.1]heptane, | C <sub>10</sub> H <sub>18</sub>                | 138                     | 10.66       | -     | -    | -    | 0.24 | 0.26 | 1.53 | -    |
| 1,10-Undecadiene                                                                  | C <sub>11</sub> H <sub>20</sub>                | 152                     | 10.83       | -     | -    | 0.49 | -    | -    | 1.12 | -    |
| 1,4-dimethyl-trans-cyclooctane                                                    | C <sub>10</sub> H <sub>20</sub>                | 140                     | 10.89       | -     | -    | 0.68 | 3.15 | 2.42 | 3.45 | 1.41 |
| 8-methyl-1-decene                                                                 | C <sub>11</sub> H <sub>22</sub>                | 154                     | 11.01       | -     | -    | 0.41 | 1.64 | 1.38 | 1.93 | -    |
| 3-ethyl-2-hydroxy-2-cyclopenten-1-one                                             | C <sub>7</sub> H <sub>10</sub> O <sub>2</sub>  | 126                     | 11.13       | 0.27  | 1.23 | -    | -    | -    | -    | -    |
| (Z)-3-Undecene                                                                    | C <sub>11</sub> H <sub>22</sub>                | 154                     | 11.17       | -     | -    | 2.97 | 0.42 | 0.21 | 0.98 | 2.16 |
| Dodecane                                                                          | C <sub>12</sub> H <sub>26</sub>                | 170                     | 11.48       | -     | -    | 1.34 | -    | -    | 2.63 | -    |
| 3-ethyl-phenol                                                                    | C <sub>8</sub> H <sub>10</sub> O               | 122                     | 12.07       | 0.21  | 0.46 | -    | -    | -    | -    | -    |
| 5,7-dimethyl-(R)-1,6-Octadiene                                                    | C <sub>10</sub> H <sub>18</sub>                | 138                     | 12.13       | -     | -    | -    | 0.13 | 0.17 | 1.93 | -    |
| 1,2,3,4-tetrahydro-1,4-methanonaphthalen-9-one                                    | C <sub>11</sub> H <sub>10</sub> O              | 158                     | 12.2        | 0.17  | -    | -    | -    | -    | -    | -    |
| 5-methyl-1-undecene                                                               | C <sub>12</sub> H <sub>24</sub>                | 168                     | 12.29       | -     | -    | -    | 1.4  | 0.7  | -    | 0.34 |
| 1,12-Tridecadiene                                                                 | C <sub>13</sub> H <sub>24</sub>                | 180                     | 12.28       | -     | -    | 0.31 | 0.35 | 1.08 | -    | -    |
| 2,6-dimethyl-phenol                                                               | C <sub>8</sub> H <sub>10</sub> O               | 122                     | 12.37       | 0.82  | 0.97 | -    | -    | -    | -    | -    |
| 1-Tridecene                                                                       | C <sub>13</sub> H <sub>26</sub>                | 182                     | 12.86       | -     | -    | 0.27 | 1.14 | 1.18 | -    | 0.56 |
| 4-ethyl-phenol                                                                    | C <sub>8</sub> H <sub>10</sub> O               | 122                     | 12.93       | 0.78  | 1.4  | -    | -    | -    | -    | -    |
| 2,5-dimethyl-(E)-1,6-octadiene                                                    | C <sub>10</sub> H <sub>18</sub>                | 138                     | 12.94       | -     | -    | -    | 0.22 | 0.28 | -    | -    |

| Compound Name                                  | Formula                                        | M <sup>+</sup> | RT    | Chaff    | BG   | NW   | T1   | T2   | CMP  | BMP  |
|------------------------------------------------|------------------------------------------------|----------------|-------|----------|------|------|------|------|------|------|
|                                                |                                                | (m/z)          | (min) | Area (%) |      |      |      |      |      |      |
| 1-Isopropyl-1,4,5-trimethylcyclohexane         | C <sub>12</sub> H <sub>24</sub>                | 168            | 13.11 | -        | -    | -    | 0.14 | 0.14 | -    | -    |
| Creosol                                        | C <sub>8</sub> H <sub>10</sub> O <sub>2</sub>  | 138            | 13.12 | 0.46     | 0.78 | -    | -    | -    | -    | -    |
| 2-Decanone                                     | C <sub>10</sub> H <sub>20</sub> O              | 156            | 13.46 | 0.3      | -    | -    | -    | -    | -    | 0.34 |
| 1,13-Tetradecadiene                            | C <sub>14</sub> H <sub>26</sub>                | 194            | 13.63 | -        | -    | 0.64 | 0.17 | 0.13 | -    | -    |
| Isocresol                                      | C <sub>8</sub> H <sub>10</sub> O <sub>3</sub>  | 138            | 13.92 | 0.43     | 0.39 | -    | -    | -    | -    | -    |
| 1-Tetradecene                                  | C <sub>14</sub> H <sub>28</sub>                | 196            | 13.95 | -        | -    | 2.51 | 0.31 | -    | 1.23 | 0.24 |
| 1,2-Benzenedimethanol                          | C <sub>8</sub> H <sub>10</sub> O <sub>2</sub>  | 138            | 14.24 | 0.2      | 0.97 | -    | -    | -    | -    | -    |
| 7-Tetradecene                                  | C <sub>14</sub> H <sub>28</sub>                | 196            | 14.26 | -        | -    | 1.44 | 0.15 | 0.13 | 0.17 | 0.93 |
| Tetradecane                                    | C <sub>14</sub> H <sub>30</sub>                | 198            | 14.74 | 0.58     | 0.5  | 0.18 | 0.55 | 0.53 | -    | 0.09 |
| (Z)-5-Tetradecene                              | C <sub>14</sub> H <sub>28</sub>                | 196            | 14.92 | -        | -    | -    | 0.36 | 0.4  | -    | -    |
| 1-Indanone                                     | C <sub>9</sub> H <sub>8</sub> O                | 132            | 15.25 | 0.59     | 0.25 | -    | -    | -    | -    | -    |
| Ethylguaiaicol                                 | C <sub>9</sub> H <sub>12</sub> O <sub>2</sub>  | 152            | 15.67 | 0.38     | 0.67 | -    | -    | -    | -    | -    |
| Vinylguaiaicol                                 | C <sub>9</sub> H <sub>10</sub> O <sub>2</sub>  | 150            | 16.54 | 2.14     | 4.37 | -    | -    | -    | -    | -    |
| 1-Pentadecyne                                  | C <sub>15</sub> H <sub>28</sub>                | 208            | 16.57 | -        | -    | 0.86 | 0.37 | 0.46 | 0.53 | -    |
| 4-Hydroxy-3-methylacetophenone                 | C <sub>9</sub> H <sub>10</sub> O <sub>2</sub>  | 150            | 16.65 | 1.22     | 1.05 | -    | -    | -    | 0.4  | -    |
| Pentadecadiene                                 | C <sub>15</sub> H <sub>28</sub>                | 208            | 16.68 | -        | -    | 2.51 | 0.28 | 0.13 | -    | 0.08 |
| 2-(2-butyryl)-Cyclohexanone                    | C <sub>10</sub> H <sub>14</sub> O              | 150            | 16.79 | -        | 0.59 | -    | -    | -    | -    | -    |
| 1-Pentadecene                                  | C <sub>15</sub> H <sub>30</sub>                | 210            | 16.97 | -        | -    | 1.2  | 5.12 | 4.25 | -    | -    |
| Pentadecane                                    | C <sub>15</sub> H <sub>32</sub>                | 212            | 17.17 | -        | -    | 1.43 | 1.19 | 1.36 | 2.18 | -    |
| Syringol                                       | C <sub>8</sub> H <sub>10</sub> O <sub>3</sub>  | 154            | 17.28 | -        | 0.54 | -    | -    | -    | 0.43 | 0.97 |
| 1-Hexadecene                                   | C <sub>16</sub> H <sub>32</sub>                | 224            | 17.61 | -        | -    | 0.91 | 3.94 | 3.33 | 1.38 | -    |
| 3-Allyl-6-methoxyphenol                        | C <sub>10</sub> H <sub>12</sub> O <sub>2</sub> | 164            | 17.68 | -        | 0.29 | -    | -    | -    | -    | 0.6  |
| 3,7-Dimethyl-2,6-nonadien-1-ol                 | C <sub>11</sub> H <sub>20</sub> O              | 168            | 18.02 | 0.1      | -    | -    | -    | -    | -    | -    |
| (1-methyl-1-butenyl)-benzene                   | C <sub>11</sub> H <sub>14</sub>                | 146            | 18.2  | 0.14     | 0.27 | -    | -    | -    | -    | -    |
| 3-(1-Ethoxyethoxy)-3-methyl-1-butene           | C <sub>9</sub> H <sub>18</sub> O <sub>2</sub>  | 158            | 18.33 | 0.26     | 0.27 | -    | -    | -    | 0.27 | 0.14 |
| 6-allyl-guaiaicol                              | C <sub>10</sub> H <sub>12</sub> O <sub>2</sub> | 164            | 18.99 | 0.15     | 0.29 | -    | -    | -    | 0.55 | 0.16 |
| (Z)-7-Hexadecene                               | C <sub>16</sub> H <sub>32</sub>                | 224            | 19    | -        | -    | 1.26 | -    | -    | 0.97 | -    |
| Cetene                                         | C <sub>16</sub> H <sub>32</sub>                | 224            | 19.29 | -        | -    | 3.38 | 1.4  | 1.17 | -    | 0.27 |
| 2-Methylpentadecane                            | C <sub>16</sub> H <sub>34</sub>                | 226            | 19.3  | -        | -    | -    | 0.47 | 1.74 | -    | -    |
| Hexadecane                                     | C <sub>16</sub> H <sub>34</sub>                | 226            | 19.56 | -        | -    | 1.25 | 1.78 | 0.22 | 0.37 | 0.11 |
| 1,6Z,9Z-Heptadecatriene                        | C <sub>17</sub> H <sub>30</sub>                | 234            | 20.45 | -        | -    | -    | 0.53 | -    | -    | -    |
| 5-decyl-Bicyclo[2.2.1]hept-2-ene               | C <sub>17</sub> H <sub>30</sub>                | 234            | 20.65 | -        | -    | -    | 0.35 | -    | -    | -    |
| Isoeugenol                                     | C <sub>10</sub> H <sub>12</sub> O <sub>2</sub> | 164            | 20.91 | 0.17     | 0.5  | -    | -    | -    | -    | 2.29 |
| n-Heptadecadiene                               | C <sub>17</sub> H <sub>32</sub>                | 236            | 21.49 | -        | -    | 1.06 | 0.36 | 0.52 | 0.22 | 1.13 |
| 1-Heptadecene                                  | C <sub>17</sub> H <sub>34</sub>                | 238            | 21.77 | -        | -    | 3.49 | 0.45 | 0.32 | 1.77 | 0.3  |
| Heptadecane                                    | C <sub>17</sub> H <sub>36</sub>                | 240            | 22.01 | -        | -    | 1.41 | 0.14 | 0.3  | 0.32 | 0.1  |
| 1,1'-(2-propyl-1,3-propanediyl)bis-cyclohexane | C <sub>18</sub> H <sub>34</sub>                | 250            | 22.14 | -        | -    | -    | 0.29 | 0.43 | 0.51 | -    |
| Octadecadiene-1,17                             | C <sub>18</sub> H <sub>34</sub>                | 250            | 22.65 | -        | -    | 0.52 | 2.56 | 2.15 | 0.35 | 0.06 |
| 6-Tetradecanone                                | C <sub>14</sub> H <sub>28</sub> O              | 212            | 23.27 | 0.21     | -    | -    | -    | -    | -    | -    |
| 1-Octadecene                                   | C <sub>18</sub> H <sub>36</sub>                | 252            | 23.69 | -        | -    | 0.22 | 1.01 | 0.78 | 0.1  | 0.29 |
| Octadecane                                     | C <sub>18</sub> H <sub>38</sub>                | 254            | 23.86 | -        | -    | 1.28 | -    | 0.57 | 0.16 | -    |
| 2-methyl-7-Octadecyne                          | C <sub>19</sub> H <sub>36</sub>                | 264            | 23.3  | -        | -    | -    | 1.21 | 0.98 | 0.13 | -    |
| 1,19-Eicosadiene                               | C <sub>20</sub> H <sub>38</sub>                | 278            | 24.11 | -        | -    | 3.06 | 0.41 | 0.22 | 0.48 | -    |
| 2,6,10-trimethyl-tetradecane                   | C <sub>17</sub> H <sub>36</sub>                | 240            | 24.31 | 0.21     | 0.14 | -    | -    | -    | -    | -    |

| Compound Name                           | Formula                                        | M <sup>+</sup><br>(m/z) | RT<br>(min) | Chaff | BG   | NW   | T1       | T2   | CMP  | BMP  |
|-----------------------------------------|------------------------------------------------|-------------------------|-------------|-------|------|------|----------|------|------|------|
|                                         |                                                |                         |             |       |      |      | Area (%) |      |      |      |
| 1-Eicosene                              | C <sub>20</sub> H <sub>40</sub>                | 280                     | 24.47       | -     | -    | 0.34 | 1.82     | 1.65 | 0.12 | -    |
| (E)-3-Eicosene                          | C <sub>20</sub> H <sub>40</sub>                | 280                     | 24.7        | -     | -    | -    | 0.22     | -    | 0.64 | 1.8  |
| Eicosane                                | C <sub>20</sub> H <sub>42</sub>                | 282                     | 24.88       | -     | -    | 1.55 | 0.29     | 0.2  | 1.61 | 3.36 |
| 2-dodecyl 1,3-propanediol               | C <sub>15</sub> H <sub>32</sub> O <sub>2</sub> | 144                     | 25.75       | 0.13  | -    | -    | -        | -    | -    | -    |
| 2-methyl-1-Hexadecanol                  | C <sub>17</sub> H <sub>36</sub> O              | 256                     | 25.97       | 0.12  | -    | -    | -        | -    | -    | -    |
| 2-Pentadecanone                         | C <sub>15</sub> H <sub>30</sub> O              | 226                     | 26.08       | 0.11  | -    | -    | -        | -    | -    | 0.29 |
| 9-Nonadecene                            | C <sub>19</sub> H <sub>38</sub>                | 266                     | 26.3        | 0.21  | 0.26 | -    | 0.46     | -    | -    | -    |
| 3Z,6Z-Heneicosadiene                    | C <sub>21</sub> H <sub>40</sub>                | 292                     | 26.33       | -     | -    | -    | 0.22     | -    | 0.13 | -    |
| 6Z,9Z-Heneicosadiene                    | C <sub>21</sub> H <sub>40</sub>                | 292                     | 26.32       | -     | -    | 0.86 | 0.21     | 0.38 | 0.77 | -    |
| 1-Heneicosene                           | C <sub>21</sub> H <sub>42</sub>                | 294                     | 26.5        | -     | -    | 1.76 | 1.16     | 0.57 | 0.16 | 0.97 |
| Nonadecane                              | C <sub>19</sub> H <sub>40</sub>                | 268                     | 26.53       | 0.17  | 0.11 | -    | -        | -    | -    | -    |
| Heneicosane                             | C <sub>21</sub> H <sub>44</sub>                | 296                     | 26.55       | 0.11  | -    | 0.88 | 0.68     | 0.65 | 0.18 | 4.45 |
| 3,7,11-trimethyl-1-Dodecanol            | C <sub>15</sub> H <sub>32</sub> O              | 228                     | 27.19       | 0.32  | 0.61 | -    | -        | -    | 0.43 | -    |
| Tetradecanoic acid                      | C <sub>14</sub> H <sub>28</sub> O <sub>2</sub> | 228                     | 27.48       | 0.36  | -    | -    | -        | -    | 0.82 | -    |
| 1-Dodecyl-decahydronaphthalin           | C <sub>22</sub> H <sub>42</sub>                | 306                     | 28.23       | -     | -    | 0.44 | 0.08     | 0.37 | 2.86 | 1.81 |
| 1-Octadecanol                           | C <sub>18</sub> H <sub>38</sub> O              | 270                     | 28.39       | 0.07  | -    | -    | -        | -    | -    | 1.57 |
| 1,21-Docosadiene                        | C <sub>22</sub> H <sub>42</sub>                | 306                     | 28.44       | -     | -    | 1.15 | 0.39     | 0.33 | 1.54 | 2.55 |
| 1-Docosene                              | C <sub>22</sub> H <sub>44</sub>                | 308                     | 28.64       | -     | -    | 0.43 | 0.2      | 0.5  | 0.82 | -    |
| Docosane                                | C <sub>22</sub> H <sub>46</sub>                | 310                     | 28.95       | -     | -    | 0.2  | 0.7      | 0.63 | 0.11 | -    |
| 7-Octyloxepan-2-one                     | C <sub>14</sub> H <sub>26</sub> O <sub>2</sub> | 226                     | 29.34       | 0.12  | -    | -    | -        | -    | 0.38 | 0.4  |
| 7-Tricosene                             | C <sub>23</sub> H <sub>46</sub>                | 322                     | 30.25       | -     | -    | 0.34 | 0.08     | 0.53 | 0.7  | 1.29 |
| 2-Heptadecanone                         | C <sub>17</sub> H <sub>34</sub> O              | 254                     | 30.26       | 0.58  | -    | -    | -        | -    | -    | 1.57 |
| 1-Nonadecene                            | C <sub>19</sub> H <sub>38</sub>                | 266                     | 30.43       | 0.08  | -    | -    | -        | -    | -    | -    |
| 1-Tricosene                             | C <sub>23</sub> H <sub>46</sub>                | 322                     | 30.46       | -     | -    | 0.95 | 0.11     | 0.34 | 3.02 | 3.54 |
| Tricosane                               | C <sub>23</sub> H <sub>48</sub>                | 324                     | 30.65       | -     | -    | 0.41 | 0.03     | 0.81 | 1.33 | 1.91 |
| Methyl-hexadecanoate                    | C <sub>17</sub> H <sub>34</sub> O <sub>2</sub> | 270                     | 30.78       | 0.05  | -    | -    | -        | -    | -    | 0.51 |
| n-Hexadecanoic acid                     | C <sub>16</sub> H <sub>32</sub> O <sub>2</sub> | 256                     | 31.47       | 0.26  | -    | -    | -        | -    | 0.25 | 0.64 |
| 1-Tetracosyne                           | C <sub>24</sub> H <sub>46</sub>                | 334                     | 31.79       | -     | -    | 0.1  | 0.06     | -    | 0.85 | 2.17 |
| 7Z-Tetracosene                          | C <sub>24</sub> H <sub>48</sub>                | 336                     | 31.8        | -     | -    | -    | 0.41     | 0.33 | 0.35 | -    |
| 9Z-Tetracosene                          | C <sub>24</sub> H <sub>48</sub>                | 336                     | 32.2        | -     | -    | 0.4  | 0.15     | 0.76 | -    | 1.42 |
| n-Eicosanol                             | C <sub>20</sub> H <sub>42</sub> O              | 298                     | 32.35       | 0.14  | -    | -    | -        | -    | 0.33 | -    |
| 1-Tetracosene                           | C <sub>24</sub> H <sub>48</sub>                | 336                     | 32.38       | -     | -    | 0.96 | 0.15     | 0.74 | 2.08 | 2.89 |
| Tetracosane                             | C <sub>24</sub> H <sub>50</sub>                | 338                     | 32.56       | -     | -    | 0.46 | 0.13     | 0.51 | 1.54 | 1.95 |
| 6,9-Pentacosadiene                      | C <sub>25</sub> H <sub>48</sub>                | 348                     | 34.05       | -     | -    | 0.45 | 0.61     | 1.23 | 0.23 | 0.3  |
| 7Z,17Z-Pentacosadiene                   | C <sub>25</sub> H <sub>48</sub>                | 348                     | 33.64       | -     | -    | -    | 0.07     | 0.61 | -    | 1.45 |
| 9-Pentacosene                           | C <sub>25</sub> H <sub>50</sub>                | 350                     | 34.22       | -     | -    | 0.99 | 0.14     | 1.13 | 2.36 | 1.7  |
| 2-Methyltetracosane                     | C <sub>25</sub> H <sub>52</sub>                | 352                     | 34.38       | -     | -    | 0.43 | 0.08     | 0.73 | 1.52 | 1.04 |
| 9-dodecyltetradecahydro-phenanthrene,   | C <sub>26</sub> H <sub>48</sub>                | 360                     | 35.71       | -     | -    | 0.07 | 0.36     | 1.43 | 0.18 | 0.16 |
| 9,10-Hexacosadiene                      | C <sub>26</sub> H <sub>50</sub>                | 362                     | 35.82       | -     | -    | 0.46 | 0.11     | 0.78 | 0.75 | 0.5  |
| 1-Hexacosene                            | C <sub>26</sub> H <sub>52</sub>                | 364                     | 35.98       | -     | -    | 1.01 | 0.17     | 1.27 | 1.39 | 1.09 |
| Heptacosadiene                          | C <sub>27</sub> H <sub>52</sub>                | 376                     | 36.13       | -     | -    | 0.48 | 0.19     | 1.03 | 0.78 | -    |
| 1-Heptacosene                           | C <sub>27</sub> H <sub>54</sub>                | 378                     | 36.41       | -     | -    | 0.06 | 0.09     | 0.61 | -    | 0.58 |
| Heptacosane                             | C <sub>27</sub> H <sub>56</sub>                | 380                     | 36.97       | -     | -    | 0.14 | 0.63     | 2.33 | 0.23 | 0.23 |
| 1,3,5-trimethyl-2-octadecyl-Cyclohexane | C <sub>27</sub> H <sub>54</sub>                | 378                     | 37.38       | -     | -    | -    | 0.07     | 0.36 | -    | -    |

| Compound Name          | Formula                         | M <sup>+</sup><br>(m/z) | RT<br>(min) | Chaff | BG | NW   | T1       | T2   | CMP  | BMP  |
|------------------------|---------------------------------|-------------------------|-------------|-------|----|------|----------|------|------|------|
|                        |                                 |                         |             |       |    |      | Area (%) |      |      |      |
| Octacosadiene          | C <sub>28</sub> H <sub>58</sub> | 390                     | 37.52       | -     | -  | 0.46 | 0.06     | 0.43 | 0.25 | 0.24 |
| 1-Octacosene           | C <sub>28</sub> H <sub>58</sub> | 392                     | 37.67       | -     | -  | 0.96 | -        | 0.54 | 0.4  | 0.46 |
| Octacosane             | C <sub>28</sub> H <sub>58</sub> | 394                     | 37.82       | -     | -  | 0.45 | 0.12     | 0.2  | 0.18 | 0.2  |
| 9Z,19Z-Nonacosadiene   | C <sub>29</sub> H <sub>56</sub> | 404                     | 37.98       | -     | -  | -    | 0.02     | 0.49 | -    | 0.14 |
| Nonacosadiene          | C <sub>29</sub> H <sub>56</sub> | 404                     | 39.16       | -     | -  | 0.41 | 0.11     | 0.44 | 0.02 | 0.33 |
| 1-Nonacosene           | C <sub>29</sub> H <sub>58</sub> | 406                     | 39.29       | -     | -  | 0.9  | 0.36     | 1.18 | 0.32 | -    |
| Nonacosane             | C <sub>29</sub> H <sub>60</sub> | 408                     | 39.43       | -     | -  | 0.39 | 0.13     | 0.47 | 0.13 | 0.12 |
| Hexahydrosqualene      | C <sub>30</sub> H <sub>56</sub> | 416                     | 39.66       | -     | -  | -    | 0.06     | 0.25 | 0.05 | -    |
| Octahydro-squalene     | C <sub>30</sub> H <sub>58</sub> | 416                     | 39.92       | -     | -  | -    | 0.10     | 0.39 | 0.05 | -    |
| 7,25-Tricontadiene     | C <sub>30</sub> H <sub>58</sub> | 416                     | 40.01       | -     | -  | -    | 0.06     | 0.18 | 0.03 | -    |
| Triacontine            | C <sub>30</sub> H <sub>58</sub> | 416                     | 40.45       | -     | -  | 0.12 | 0.57     | 1.69 | 0.24 | 0.13 |
| Triacontadiene         | C <sub>30</sub> H <sub>60</sub> | 418                     | 40.72       | -     | -  | 0.34 | -        | 0.14 | 0.06 | 0.09 |
| 1-Triacontene          | C <sub>30</sub> H <sub>60</sub> | 420                     | 40.85       | -     | -  | 0.75 | 0.10     | 0.47 | 0.15 | 0.2  |
| Triacontane            | C <sub>30</sub> H <sub>62</sub> | 422                     | 40.98       | -     | -  | 0.38 | 0.06     | 0.29 | 0.1  | 0.12 |
| Hentriaconta-1,3-diene | C <sub>31</sub> H <sub>60</sub> | 432                     | 42.33       | -     | -  | 0.3  | 0.13     | 0.34 | 0.11 | 0.09 |
| 1-Hentriacontene       | C <sub>31</sub> H <sub>62</sub> | 434                     | 42.47       | -     | -  | 0.62 | 0.05     | 0.17 | 0.1  | 0.13 |
| Hentriacontane         | C <sub>31</sub> H <sub>64</sub> | 436                     | 42.61       | -     | -  | 0.32 | 0.18     | 0.22 | 0.09 | 0.08 |
| Dotriacontadiene       | C <sub>32</sub> H <sub>62</sub> | 446                     | 44.24       | -     | -  | 0.26 | 0.45     | 1.04 | 0.37 | 0.16 |
| 1-Dotriacontene        | C <sub>32</sub> H <sub>64</sub> | 448                     | 44.41       | -     | -  | 0.49 | -        | 0.16 | 0.08 | 0.09 |
| Dotriacontane          | C <sub>32</sub> H <sub>66</sub> | 450                     | 44.58       | -     | -  | 0.26 | -        | 0.12 | 0.05 | 0.06 |
| Tritriacontadiene      | C <sub>33</sub> H <sub>64</sub> | 460                     | 46.6        | -     | -  | 0.13 | -        | 0.11 | -    | 0.08 |
| 1-Tritriacontene       | C <sub>33</sub> H <sub>66</sub> | 462                     | 46.81       | -     | -  | 0.29 | -        | 0.23 | -    | -    |
| Tritriacontane         | C <sub>33</sub> H <sub>68</sub> | 464                     | 47.02       | -     | -  | 0.17 | -        | -    | 0.04 | -    |
| 1-Tettratriacontene    | C <sub>34</sub> H <sub>68</sub> | 476                     | 49.56       | -     | -  | 0.11 | -        | 0.27 | -    | -    |
| 1-Pentatriacontene     | C <sub>35</sub> H <sub>70</sub> | 490                     | 49.83       | -     | -  | 0.23 | -        | 0.21 | -    | -    |
| Pentatriacontane       | C <sub>35</sub> H <sub>72</sub> | 492                     | 50.07       | -     | -  | 0.11 | -        | 0.87 | -    | -    |

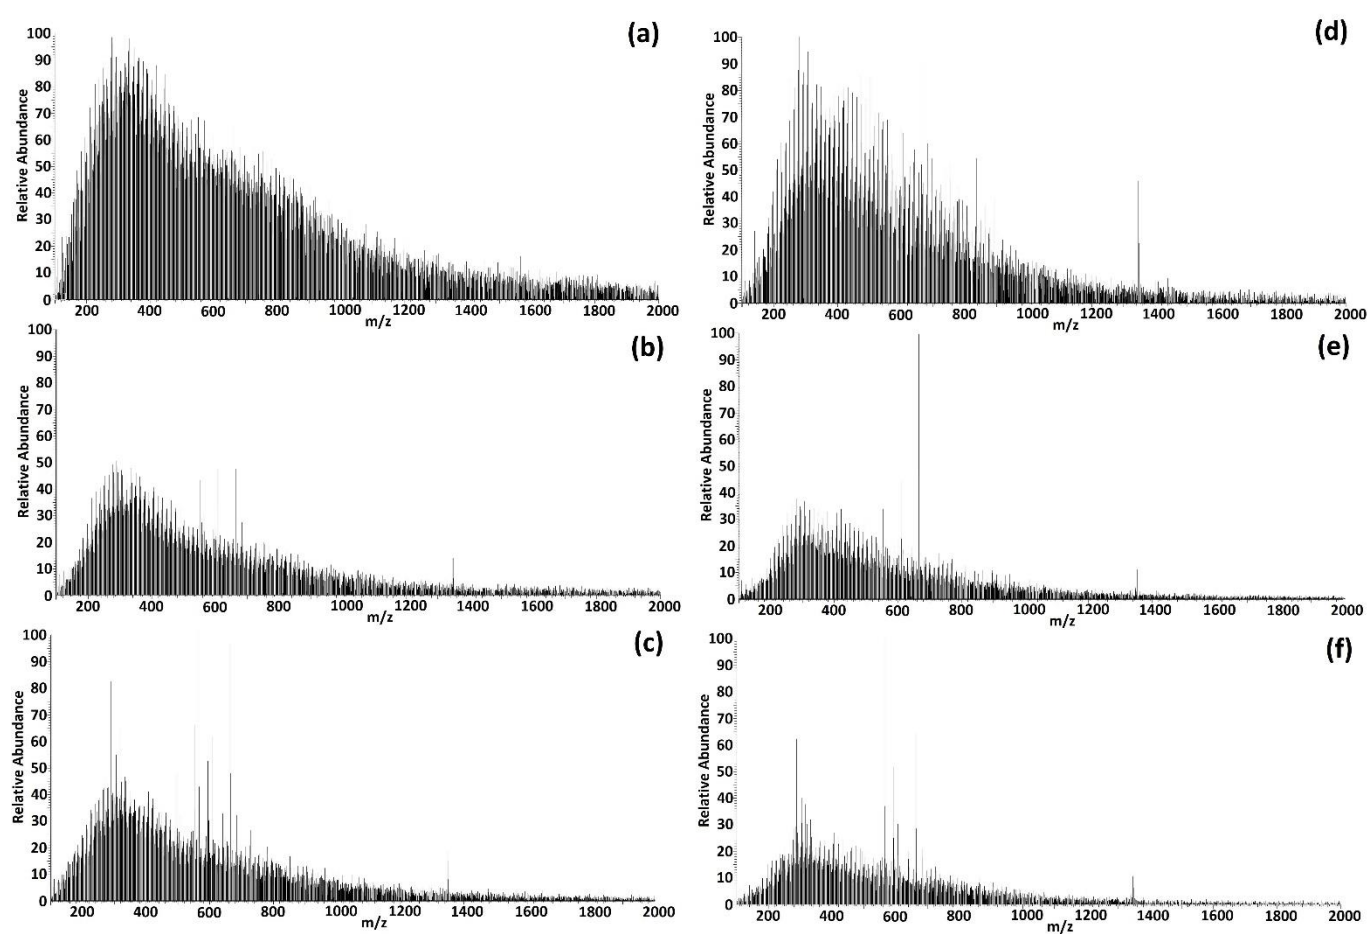

**Figure S3.** Positive-ion ESI-MS spectra of the products of liquid products of catalytic pyrolysis of bluegrass-mixed plastic (BMP) at (a) 500 °C, (b) 550 °C, and (c) 600 °C and chaff-mixed plastic (CMP) at (d) 500 °C, (e) 550 °C, and (f) 600 °C.



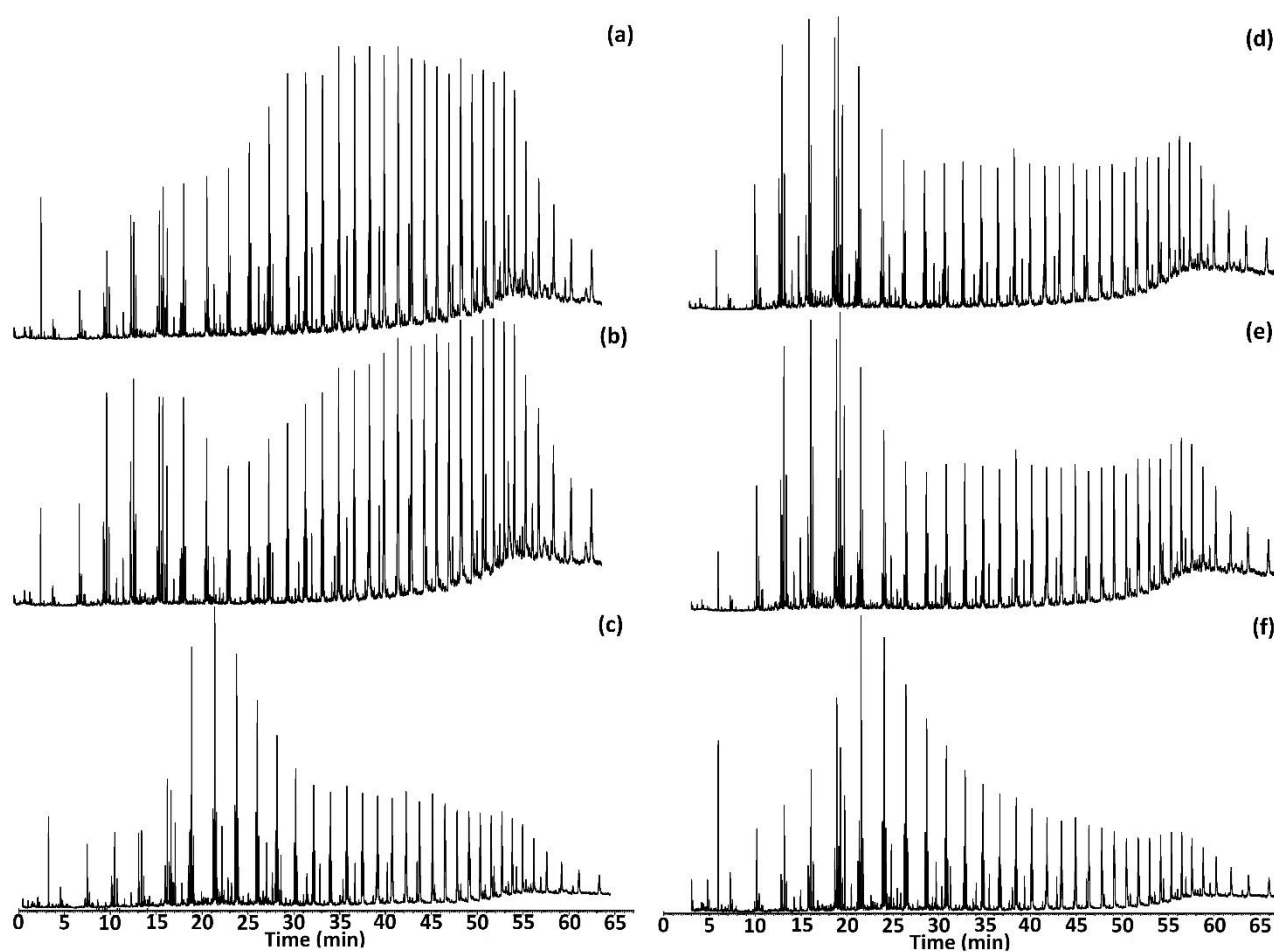

**Figure S4.** GC-MS chromatograms of liquid products collected in U-tube condenser from thermal pyrolysis of BMP at (a) 500 °C, (b) 550 °C, and (c), 600 °C and CMP at (d) 500 °C, (e) 550 °C, and (f) 600 °C.

**Table S2.** Identified compounds in the liquid products of thermal pyrolysis of BMP and CMP at 500, 550, and 600 °C collected from the condenser. The units are mg compound per g resultant liquid product.

| Compound Name                                                                    | Formula                                       | M <sup>+</sup><br>(m/z) | RT    | BMP500 | BMP550 | BMP600 | CMP500 | CMP550 | CMP600 |
|----------------------------------------------------------------------------------|-----------------------------------------------|-------------------------|-------|--------|--------|--------|--------|--------|--------|
|                                                                                  |                                               |                         | Min   | mg/g   | mg/g   | mg/g   | mg/g   | mg/g   | mg/g   |
| 1-Heptene                                                                        | C <sub>7</sub> H <sub>14</sub>                | 98                      | 3.05  | 1.16   | 0.64   | 1.37   | 0.15   | 2.63   | 4.83   |
| Heptane                                                                          | C <sub>7</sub> H <sub>16</sub>                | 100                     | 3.16  | 0.74   | 0.36   | -      | -      | 1.70   | 1.68   |
| methyl-Cyclohexane                                                               | C <sub>7</sub> H <sub>14</sub>                | 98                      | 3.52  | -      | -      | -      | -      | 0.36   | 0.59   |
| Glycerol                                                                         | C <sub>3</sub> H <sub>8</sub> O <sub>3</sub>  | 92                      | 3.69  | -      | -      | 0.69   | -      | 0.46   | 0.49   |
| 2,2-Dimethoxybutane                                                              | C <sub>6</sub> H <sub>14</sub> O <sub>2</sub> | 118                     | 4.18  | 0.81   | 0.68   | 0.84   | 0.58   | 1.28   | 1.69   |
| 4-methyl-Heptane                                                                 | C <sub>8</sub> H <sub>18</sub>                | 114                     | 4.27  | -      | -      | -      | -      | 1.34   | 0.99   |
| 2-methyl-1-Heptene                                                               | C <sub>8</sub> H <sub>16</sub>                | 112                     | 4.68  | -      | -      | -      | -      | 0.73   | 0.69   |
| 2-cyclopropyl-Pentane                                                            | C <sub>8</sub> H <sub>16</sub>                | 112                     | 4.7   | -      | -      | -      | 0.25   | 4.01   | 4.73   |
| 1-Octene                                                                         | C <sub>8</sub> H <sub>16</sub>                | 112                     | 4.77  | 0.92   | 0.81   | 1.19   | -      | -      | -      |
| 3-ethyl-Hexane                                                                   | C <sub>8</sub> H <sub>18</sub>                | 114                     | 4.95  | 0.70   | 0.58   | 0.65   | -      | 1.95   | 1.69   |
| 2,4-Dimethyl-1-heptene                                                           | C <sub>9</sub> H <sub>18</sub>                | 126                     | 5.95  | 10.9   | 5.38   | 9.47   | 4.18   | 36.4   | 27.8   |
| 1,2,4-trimethyl-trans,cis-Cyclohexane                                            | C <sub>9</sub> H <sub>18</sub>                | 126                     | 6.31  | 0.68   | 0.26   | 0.47   | 0.23   | 1.76   | 1.04   |
| 3,3,5-trimethyl-Cyclohexene                                                      | C <sub>9</sub> H <sub>16</sub>                | 124                     | 6.72  | -      | -      | -      | -      | 0.92   | 0.90   |
| 1,8-Nonadiene                                                                    | C <sub>9</sub> H <sub>16</sub>                | 124                     | 7.02  | -      | -      | -      | -      | 0.77   | 0.92   |
| 1-Nonene                                                                         | C <sub>9</sub> H <sub>18</sub>                | 126                     | 7.26  | 1.53   | 1.18   | 2.01   | 1.15   | 2.50   | 2.66   |
| 3-Ethyl-4-methylpentan-1-ol                                                      | C <sub>8</sub> H <sub>18</sub> O              | 130                     | 7.32  | 0.89   | 0.65   | 1.01   | 0.71   | 5.59   | 6.11   |
| Nonane                                                                           | C <sub>9</sub> H <sub>20</sub>                | 128                     | 7.5   | 0.95   | 0.59   | 1.00   | 0.90   | 2.91   | 2.47   |
| 2,6-dimethyl-1,6-Octadiene                                                       | C <sub>10</sub> H <sub>18</sub>               | 38                      | 7.91  | 0.38   | 0.20   | -      | 0.32   | 0.99   | 0.75   |
| 1,9-Decadiene                                                                    | C <sub>10</sub> H <sub>18</sub>               | 138                     | 9.2   | -      | -      | -      | 0.36   | 0.33   | 0.19   |
| Bicyclo[7.1.0]-decane                                                            | C <sub>10</sub> H <sub>18</sub>               | 138                     | 9.92  | 0.33   | 0.57   | 0.65   | 0.78   | 1.26   | 1.69   |
| Phenol                                                                           | C <sub>6</sub> H <sub>6</sub> O               | 94                      | 9.98  | 0.47   | 0.89   | 1.06   | -      | -      | -      |
| 4-methyl-Nonane                                                                  | C <sub>10</sub> H <sub>22</sub>               | 142                     | 10.1  | -      | -      | -      | 10.10  | 10.92  | -      |
| 1-Decene                                                                         | C <sub>10</sub> H <sub>20</sub>               | 140                     | 10.2  | 3.66   | 5.64   | 6.00   | 0.89   | 1.08   | 15.41  |
| (3-methylbutyl)-Cyclopentane                                                     | C <sub>10</sub> H <sub>20</sub>               | 140                     | 10.3  | -      | 0.60   | 0.55   | 4.20   | 2.87   | 1.87   |
| Decane                                                                           | C <sub>10</sub> H <sub>22</sub>               | 142                     | 10.4  | 1.29   | 1.55   | 1.45   | -      | -      | 3.20   |
| 5-ethyl-2-methyl-Heptane                                                         | C <sub>10</sub> H <sub>22</sub>               | 142                     | 10.7  | 0.57   | 0.73   | 0.70   | 1.92   | 1.26   | 1.37   |
| 3,3-dimethyl-Octane                                                              | C <sub>10</sub> H <sub>22</sub>               | 142                     | 10.8  | 0.67   | 0.87   | 0.63   | 2.11   | 1.13   | 1.39   |
| 3-methyl-1,2-Cyclopentanedione                                                   | C <sub>6</sub> H <sub>8</sub> O <sub>2</sub>  | 112                     | 11.3  | -      | -      | 1.08   | -      | 0.24   | -      |
| 3-pentyl-(2Z)-2,4-Pentadien-1-ol                                                 | C <sub>10</sub> H <sub>18</sub> O             | 154                     | 12.2  | -      | -      | -      | -      | 0.32   | -      |
| 2,6,6-trimethyl-(1 $\alpha$ ,2 $\alpha$ ,5 $\alpha$ )-Bicyclo[3.1.1]heptan-3-one | C <sub>10</sub> H <sub>16</sub> O             | 152                     | 12.3  | -      | -      | -      | 0.66   | 0.27   | -      |
| 4-ethyl-1,2-dimethyl-Benzene                                                     | C <sub>10</sub> H <sub>14</sub>               | 134                     | 12.8  | 3.55   | 4.81   | 3.68   | 11.3   | 4.80   | 6.93   |
| (E)-2-Decen-1-ol                                                                 | C <sub>10</sub> H <sub>20</sub> O             | 156                     | 12.9  | 2.54   | 4.38   | 2.39   | 9.17   | 4.44   | 7.32   |
| 1-Undecene                                                                       | C <sub>11</sub> H <sub>22</sub>               | 154                     | 13.2  | 6.95   | 12.6   | 7.52   | 22.6   | 11.0   | 20.4   |
| (Z)-4-Undecene                                                                   | C <sub>11</sub> H <sub>22</sub>               | 154                     | 13.4  | 3.91   | 4.51   | 3.30   | 12.3   | 4.42   | 5.53   |
| Undecane                                                                         | C <sub>11</sub> H <sub>24</sub>               | 156                     | 13.6  | 0.43   | 0.67   | 0.33   | 1.40   | 0.58   | 0.77   |
| (2,4,6-Trimethylcyclohexyl) methanol                                             | C <sub>10</sub> H <sub>20</sub> O             | 156                     | 14.4  | -      | 0.77   | -      | 1.75   | 1.33   | 2.82   |
| 4,8-dimethyl-1,7-Nonadiene                                                       | C <sub>11</sub> H <sub>20</sub>               | 138                     | 14.9  | 1.98   | 3.38   | 1.54   | 6.77   | 2.19   | 4.28   |
| 2-Isopropenyl-5-methylhex-4-enal                                                 | C <sub>10</sub> H <sub>16</sub> O             | 152                     | 15.01 | 0.62   | 0.82   | 0.41   | 2.02   | 0.50   | 0.93   |
| 1-Isopropyl-1,4,5-trimethylcyclohexane                                           | C <sub>12</sub> H <sub>24</sub>               | 168                     | 15.2  | -      | -      | -      | 1.15   | 0.25   | -      |
| 1,11-Dodecadiene                                                                 | C <sub>12</sub> H <sub>22</sub>               | 166                     | 15.8  | 1.45   | 2.90   | 1.92   | 4.52   | 1.80   | 6.31   |
| 1-Dodecene                                                                       | C <sub>12</sub> H <sub>24</sub>               | 168                     | 16.1  | 9.27   | 13.6   | 7.48   | 25.8   | 10.3   | 27.5   |

| Compound Name                                | Formula                                        | M <sup>+</sup><br>(m/z) | RT   | BMP500 | BMP550 | BMP600 | CMP500 | CMP550 | CMP600 |
|----------------------------------------------|------------------------------------------------|-------------------------|------|--------|--------|--------|--------|--------|--------|
|                                              |                                                |                         | Min  | mg/g   | mg/g   | mg/g   | mg/g   | mg/g   | mg/g   |
| (E)-3-Decen-1-ol                             | C <sub>10</sub> H <sub>20</sub> O              | 156                     | 16.2 | -      | -      | -      | 1.34   | 4.98   | 9.26   |
| Dodecane                                     | C <sub>12</sub> H <sub>26</sub>                | 170                     | 16.3 | 4.75   | 5.41   | 2.99   | 14.1   | 0.43   | 1.33   |
| 1-butyl-2-propyl-Cyclopentane                | C <sub>12</sub> H <sub>24</sub>                | 168                     | 16.4 | 0.67   | 0.81   | 1.75   | 1.58   | 0.29   | 2.14   |
| (1,2-dimethylpropyl)-Cyclohexane             | C <sub>11</sub> H <sub>22</sub>                | 154                     | 16.8 | 0.71   | 0.88   | 0.83   | 1.35   | 0.62   | -      |
| 2,3-dihydro-Benzofuran                       | C <sub>8</sub> H <sub>8</sub> O                | 120                     | 16.9 | 0.53   | 0.70   | 1.21   | 0.71   | 0.31   | 1.55   |
| 4,6,8-trimethyl-1-Nonene                     | C <sub>12</sub> H <sub>24</sub>                | 168                     | 17.3 | -      | -      | -      | 1.37   | 0.25   | 1.05   |
| 2,6,7-trimethyl-Decane                       | C <sub>13</sub> H <sub>28</sub>                | 184                     | 17.3 | 0.65   | 0.40   | 0.49   | 0.33   | 0.39   | 1.91   |
| 1-Ethyl-2,2,6-trimethylcyclohexane           | C <sub>11</sub> H <sub>22</sub>                | 154                     | 18.2 | -      | 0.64   | 1.20   | 1.24   | 0.50   | 2.03   |
| 8-Dodecenol                                  | C <sub>12</sub> H <sub>24</sub> O              | 152                     | 18.7 | 2.25   | 3.50   | 3.85   | 4.50   | 2.36   | 12.7   |
| Hydroquinone                                 | C <sub>6</sub> H <sub>6</sub> O <sub>2</sub>   | 110                     | 18.7 | 1.42   | 1.36   | 1.14   | 2.49   | 1.21   | 4.13   |
| 1-Tridecene                                  | C <sub>13</sub> H <sub>26</sub>                | 182                     | 18.9 | 9.46   | 12.3   | 12.2   | 23.1   | 11.2   | 41.6   |
| Tridecane                                    | C <sub>13</sub> H <sub>28</sub>                | 184                     | 19.1 | 4.36   | 4.57   | 4.31   | 11.2   | 4.90   | 11.7   |
| 2-butyl-1-Octanol                            | C <sub>12</sub> H <sub>26</sub> O              | 186                     | 19.3 | 12.2   | 13.0   | 12.0   | 28.4   | 12.3   | 32.3   |
| 1-Dodecanol                                  | C <sub>12</sub> H <sub>26</sub> O              | 186                     | 19.5 | 2.99   | 2.92   | 2.92   | 7.19   | 2.81   | 7.98   |
| 5-methyl-2-(1-methylethyl)-1-Hexanol-acetate | C <sub>12</sub> H <sub>24</sub> O <sub>2</sub> | 200                     | 19.7 | 8.34   | 8.57   | 8.97   | 19.3   | 8.14   | 22.6   |
| 2-Methyl-1-undecanol                         | C <sub>12</sub> H <sub>26</sub> O              | 186                     | 20.5 | -      | 1.70   | 2.37   | 3.66   | 1.64   | 5.41   |
| 1,14-Tetradecanediol                         | C <sub>14</sub> H <sub>30</sub> O <sub>2</sub> | 230                     | 21.1 | 2.90   | 2.84   | 4.19   | 5.37   | 2.87   | 10.9   |
| 1,13-Tetradecadiene                          | C <sub>14</sub> H <sub>26</sub>                | 194                     | 21.3 | 3.14   | 4.09   | 7.79   | 22.0   | 15.5   | 20.0   |
| 1-Tetradecene                                | C <sub>14</sub> H <sub>28</sub>                | 196                     | 21.5 | 11.8   | 12.7   | 25.6   | 1.44   |        | 60.7   |
| Tetradecane                                  | C <sub>14</sub> H <sub>30</sub>                | 198                     | 21.6 | 21.7   | 1.03   | 1.32   | 9.12   | 4.68   | 4.29   |
| E-10-Pentadecenol                            | C <sub>15</sub> H <sub>30</sub> O              | 226                     | 21.7 | 4.39   | 3.66   | 7.10   | 1.03   | 0.66   | 15.1   |
| (Z)-11-Hexadecen-1-ol                        | C <sub>16</sub> H <sub>32</sub> O              | 240                     | 23.9 | 3.14   | 3.00   | 10.1   | 4.13   | 4.30   | 19.1   |
| 1-Hexadecanol                                | C <sub>16</sub> H <sub>34</sub> O              | 242                     | 24.1 | 12.1   | 10.4   | 30.5   | 16.8   | 15.4   | 58.9   |
| 1-Pentadecene                                | C <sub>15</sub> H <sub>30</sub>                | 210                     | 24.2 | 5.49   | 3.73   | 9.46   | 8.49   | 5.82   | 17.7   |
| 2-ethyl-trans-1,1'-Bicyclohexyl              | C <sub>14</sub> H <sub>26</sub>                | 194                     | 24.4 | -      | 1.15   | 3.63   | -      | -      | 6.00   |
| Pentadecane                                  | C <sub>15</sub> H <sub>32</sub>                | 212                     | 24.6 | 0.75   | 0.77   | 2.25   | 1.11   | 1.04   | 3.89   |
| 2-Hexyl-1-decanol                            | C <sub>16</sub> H <sub>34</sub> O              | 242                     | 24.8 | 4.12   | 2.98   | 9.84   | 4.70   | 5.13   | 17.1   |
| 2-Hexyl-1-octanol                            | C <sub>14</sub> H <sub>30</sub> O              | 214                     | 25.5 | 2.16   | 1.63   | 3.99   | 2.43   | 2.17   | 6.80   |
| 3,7,11-trimethyl-1-Dodecanol                 | C <sub>15</sub> H <sub>32</sub> O              | 228                     | 25.8 | 0.99   | 0.84   | 2.45   | 1.02   | 0.99   | 5.28   |
| Hexadecadiene                                | C <sub>16</sub> H <sub>30</sub>                | 222                     | 26.2 | 4.48   | 3.13   | 11.3   | 3.91   | 4.78   | 18.4   |
| 1-Hexadecene                                 | C <sub>16</sub> H <sub>32</sub>                | 224                     | 26.4 | 16.9   | 8.89   | 25.6   | 13.5   | 14.5   | 44.6   |
| hexadecyl-Oxirane                            | C <sub>18</sub> H <sub>36</sub> O              | 268                     | 26.5 | -      | 2.68   | 6.80   | 4.22   | 3.71   | 12.8   |
| Hexadecane                                   | C <sub>16</sub> H <sub>34</sub>                | 226                     | 26.6 | 6.06   | 2.97   | 8.65   | 6.87   | 6.31   | 14.1   |
| 9-Hexadecenoic acid                          | C <sub>16</sub> H <sub>30</sub> O <sub>2</sub> | 254                     | 27.1 | 0.86   | 0.71   | 1.34   | 0.81   | 0.63   | -      |
| n-Heptadecadiene                             | C <sub>17</sub> H <sub>32</sub>                | 236                     | 28.5 | 4.56   | 3.34   | 9.10   | 3.69   | 5.70   | 17.7   |
| 1-Heptadecene                                | C <sub>17</sub> H <sub>34</sub>                | 238                     | 28.7 | 15.3   | 9.28   | 21.5   | 13.4   | 16.2   | 38.7   |
| Heptadecane                                  | C <sub>17</sub> H <sub>36</sub>                | 240                     | 28.8 | 7.43   | 3.91   | 7.44   | 7.39   | 7.39   | 12.6   |
| 2-methyl-1-Hexadecanol                       | C <sub>17</sub> H <sub>36</sub> O              | 256                     | 29.7 | 5.82   | 3.35   | 7.02   | 4.74   | 5.81   | 10.9   |
| 4-Hexyldecan-1-ol                            | C <sub>16</sub> H <sub>34</sub> O              | 242                     | 30.3 | 4.24   | 2.60   | 4.49   | 3.51   | 3.61   | 6.31   |
| 9,12-Octadecadiene                           | C <sub>18</sub> H <sub>34</sub>                | 250                     | 30.7 | 6.72   | 4.63   | 8.98   | 4.45   | 6.44   | 16.4   |
| 1-Octadecene                                 | C <sub>18</sub> H <sub>36</sub>                | 252                     | 30.8 | 17.6   | 10.7   | 17.2   | 14.2   | 17.6   | 34.5   |
| Octadecane                                   | C <sub>18</sub> H <sub>38</sub>                | 254                     | 30.9 | 8.98   | 4.54   | 7.11   | 8.04   | 7.85   | 11.2   |
| Cyclododecanemethanol                        | C <sub>13</sub> H <sub>26</sub> O              | 198                     | 31.3 | 6.28   | 3.17   | 5.27   | 3.88   | 4.59   | 9.09   |
| 8,11-Nonadecadiene                           | C <sub>19</sub> H <sub>36</sub>                | 264                     | 32.7 | 6.12   | 4.59   | 6.41   | 3.83   | 6.40   | 14.1   |

| Compound Name                                  | Formula                                        | M <sup>+</sup><br>(m/z) | RT    | BMP500 | BMP550 | BMP600 | CMP500 | CMP550 | CMP600 |
|------------------------------------------------|------------------------------------------------|-------------------------|-------|--------|--------|--------|--------|--------|--------|
|                                                |                                                |                         | Min   | mg/g   | mg/g   | mg/g   | mg/g   | mg/g   | mg/g   |
| 1-Nonadecene                                   | C <sub>19</sub> H <sub>38</sub>                | 266                     | 32.9  | 19.8   | 11.7   | 14.3   | 14.4   | 19.0   | 29.4   |
| Nonadecane                                     | C <sub>19</sub> H <sub>40</sub>                | 268                     | 32.9  | 10.0   | 5.19   | 5.92   | 8.81   | 8.85   | 10.7   |
| 2-(9-octadecenyloxy)-(Z)-Ethanol               | C <sub>20</sub> H <sub>40</sub> O <sub>2</sub> | 312                     | 33.7  | 1.85   | 1.10   | 1.66   | 1.09   | 1.36   | 3.25   |
| 1,19-Eicosadiene                               | C <sub>20</sub> H <sub>38</sub>                | 278                     | 34.6  | 2.23   | 1.49   | 1.92   | 1.55   | 1.72   | 2.76   |
| (E)-3-Eicosene                                 | C <sub>20</sub> H <sub>40</sub>                | 280                     | 34.7  | 6.50   | 5.13   | 5.49   | 3.78   | 6.61   | 12.2   |
| 1-Eicosene                                     | C <sub>20</sub> H <sub>40</sub>                | 280                     | 34.8  | 20.5   | 12.9   | 12.2   | 14.1   | 18.5   | 26.6   |
| Eicosane                                       | C <sub>20</sub> H <sub>42</sub>                | 282                     | 34.9  | 11.9   | 6.68   | 6.18   | 9.54   | 10.3   | 12.0   |
| 1-Eicosanol                                    | C <sub>20</sub> H <sub>42</sub> O              | 298                     | 35.5  | 7.49   | 4.93   | 4.61   | 5.23   | 7.16   | 8.60   |
| 1-(ethenyloxy)-Octadecane                      | C <sub>20</sub> H <sub>40</sub> O              | 296                     | 35.9  | 1.26   | 0.63   | -      | -      | -      | -      |
| Heneicosadiene                                 | C <sub>21</sub> H <sub>40</sub>                | 292                     | 36.7  | 7.42   | 5.48   | 5.65   | 3.93   | 7.47   | 11.9   |
| 1-Heneicosene                                  | C <sub>21</sub> H <sub>42</sub>                | 294                     | 36.7  | 20.7   | 13.3   | 11.2   | 14.6   | 19.2   | 23.7   |
| 10-Heneicosene (c,t)                           | C <sub>21</sub> H <sub>42</sub>                | 294                     | 36.8  | 10.7   | 5.46   | 4.73   | 8.90   | 9.05   | 9.61   |
| Heneicosane                                    | C <sub>21</sub> H <sub>44</sub>                | 296                     | 36.9  | 1.58   | 0.56   | -      | -      | -      | -      |
| cis-13-Docosenoic acid                         | C <sub>22</sub> H <sub>42</sub> O <sub>2</sub> | 338                     | 37.7  | 1.99   | 1.59   | 1.32   | 1.12   | 1.59   | 2.19   |
| Behenic alcohol                                | C <sub>22</sub> H <sub>46</sub> O              | 326                     | 38.1  | 4.63   | 3.64   | 2.65   | 3.21   | 4.49   | 5.15   |
| Docosadiene                                    | C <sub>22</sub> H <sub>42</sub>                | 306                     | 38.4  | 7.14   | 6.18   | 5.38   | 4.09   | 7.10   | 11.3   |
| 1-Docosene                                     | C <sub>22</sub> H <sub>44</sub>                | 308                     | 38.5  | 23.8   | 15.2   | 12.6   | 15.7   | 21.0   | 24.9   |
| Docosane                                       | C <sub>22</sub> H <sub>46</sub>                | 310                     | 38.5  | 11.3   | 7.11   | 5.04   | 8.68   | 9.81   | 9.47   |
| Phytol                                         | C <sub>20</sub> H <sub>40</sub> O              | 296                     | 39.4  | 9.39   | 6.37   | 5.34   | 1.70   | 7.84   | 8.35   |
| 11,13-Dimethyl-12-tetradecenyl acetate         | C <sub>18</sub> H <sub>34</sub> O <sub>2</sub> | 282                     | 39.7  | 1.46   | 0.83   | 0.69   | 0.74   | 0.95   | 1.61   |
| Tricosadiene                                   | C <sub>23</sub> H <sub>44</sub>                | 320                     | 40.1  | 7.87   | 6.42   | 5.61   | 4.61   | 8.19   | 10.30  |
| 1-Tricosene                                    | C <sub>23</sub> H <sub>46</sub>                | 322                     | 40.2  | 21.1   | 14.1   | 11.2   | 15.2   | 19.4   | 22.0   |
| Tricosane                                      | C <sub>23</sub> H <sub>48</sub>                | 324                     | 40.2  | 12.0   | 6.47   | 5.12   | 9.57   | 10.3   | 8.45   |
| Tetracos-1,3,5-triene                          | C <sub>24</sub> H <sub>44</sub>                | 332                     | 41.6  | 3.94   | 3.71   | 2.31   | 2.61   | 3.63   | 3.94   |
| Tetracosadiene                                 | C <sub>24</sub> H <sub>46</sub>                | 334                     | 41.7  | 7.34   | 5.25   | 4.72   | 3.73   | 7.49   | 10.5   |
| 1-Tetracosene                                  | C <sub>24</sub> H <sub>48</sub>                | 336                     | 41.8  | 22.2   | 16.6   | 11.9   | 14.8   | 19.0   | 17.8   |
| Tetracosane                                    | C <sub>24</sub> H <sub>50</sub>                | 338                     | 41.9  | 11.4   | 6.96   | 5.14   | 8.88   | 10.0   | 8.37   |
| Pentacosanal                                   | C <sub>25</sub> H <sub>50</sub> O              | 366                     | 42.8  | 8.96   | 6.63   | 4.78   | 5.73   | 7.94   | 8.13   |
| 1-cyclopentyl-4-(3-cyclopentylpropyl)-Dodecane | C <sub>25</sub> H <sub>48</sub>                | 348                     | 43.23 | 1.51   | 0.98   | 0.83   | 0.74   | 1.21   | 1.34   |
| 6,9-Pentacosadiene                             | C <sub>25</sub> H <sub>48</sub>                | 348                     | 43.3  | 7.41   | 6.17   | 5.97   | 3.76   | 7.76   | 8.24   |
| 9-Pentacosene                                  | C <sub>25</sub> H <sub>50</sub>                | 350                     | 43.4  | 22.6   | 17.2   | 11.8   | 13.1   | 19.7   | 18.7   |
| Pentacosane                                    | C <sub>25</sub> H <sub>52</sub>                | 352                     | 43.5  | 15.0   | 9.11   | 6.68   | 10.8   | 10.7   | 9.20   |
| Hexacos-1,3-diene                              | C <sub>26</sub> H <sub>50</sub>                | 362                     | 44.8  | 7.43   | 6.23   | 5.23   | 3.32   | 1.74   | 2.57   |
| 1-Hexacosene                                   | C <sub>26</sub> H <sub>52</sub>                | 364                     | 44.9  | 23.4   | 17.6   | 12.6   | 14.5   | 6.52   | 9.36   |
| Hexacosane                                     | C <sub>26</sub> H <sub>54</sub>                | 366                     | 44.9  | 19.8   | 13.1   | 8.55   | 12.3   | 19.5   | 18.9   |
| 2'-dodecyl-1,1':3',1''-Tercyclopentane         | C <sub>27</sub> H <sub>50</sub>                | 374                     | 45.6  | 9.37   | 6.92   | 0.80   | 6.03   | 15.3   | 11.4   |
| Heptacosadiene                                 | C <sub>27</sub> H <sub>52</sub>                | 376                     | 46.3  | 6.12   | 6.17   | 5.30   | 3.00   | 6.79   | 6.29   |
| 1-Heptacosene                                  | C <sub>27</sub> H <sub>54</sub>                | 378                     | 46.4  | 20.6   | 14.2   | 11.9   | 13.7   | 19.9   | 18.5   |
| Heptacosane                                    | C <sub>27</sub> H <sub>56</sub>                | 380                     | 46.4  | 18.0   | 11.6   | 7.45   | 10.5   | 12.8   | 9.96   |
| 1-Octacosene                                   | C <sub>28</sub> H <sub>56</sub>                | 392                     | 47.8  | 32.7   | 25.3   | 19.1   | 18.7   | 24.0   | 25.0   |
| Octacosane                                     | C <sub>28</sub> H <sub>58</sub>                | 394                     | 47.8  | 14.4   | 11.1   | 6.80   | 11.8   | 12.4   | 8.97   |
| 1-Heptacosanol                                 | C <sub>27</sub> H <sub>56</sub> O              | 396                     | 48.1  | 3.91   | 3.35   | 2.34   | 2.67   | 4.09   | 3.87   |
| Octacosanol                                    | C <sub>28</sub> H <sub>58</sub> O              | 410                     | 48.6  | 1.68   | 0.97   | 0.85   | 7.50   | 9.97   | 12.1   |
| 7-Nonacosene                                   | C <sub>29</sub> H <sub>58</sub>                | 406                     | 49.1  | -      | -      | 10.3   | 14.4   | 20.5   | 29.7   |

| Compound Name                                                                  | Formula                           | M <sup>+</sup><br>(m/z) | RT   | BMP500 | BMP550 | BMP600 | CMP500 | CMP550 | CMP600 |
|--------------------------------------------------------------------------------|-----------------------------------|-------------------------|------|--------|--------|--------|--------|--------|--------|
|                                                                                |                                   |                         | Min  | mg/g   | mg/g   | mg/g   | mg/g   | mg/g   | mg/g   |
| 1-Nonacosene                                                                   | C <sub>29</sub> H <sub>58</sub>   | 406                     | 49.2 | 55.7   | 29.0   | 12.8   | 11.7   | 12.6   | 10.2   |
| Nonacosane                                                                     | C <sub>29</sub> H <sub>60</sub>   | 408                     | 49.2 | -      | -      | 8.26   | 3.36   | 34.9   | 31.5   |
| 1-Triacontene                                                                  | C <sub>30</sub> H <sub>60</sub>   | 420                     | 50.5 | 50.8   | 35.6   | 25.5   | 17.0   | 2.97   | 2.97   |
| Triacontane                                                                    | C <sub>30</sub> H <sub>62</sub>   | 422                     | 50.6 | -      | 2.71   | 1.83   | 11.1   | -      | -      |
| Docosyl octyl ether                                                            | C <sub>30</sub> H <sub>62</sub> O | 438                     | 50.9 | 6.99   | 4.76   | 2.75   | 3.71   | 5.60   | 4.63   |
| 1-Hentriacontene                                                               | C <sub>31</sub> H <sub>62</sub>   | 436                     | 51.7 | 46.0   | 36.9   | 28.9   | 31.1   | 33.8   | 31.7   |
| Hentriacontane                                                                 | C <sub>31</sub> H <sub>64</sub>   | 436                     | 51.9 | 15.2   | 12.0   | 9.92   | 7.64   | 9.81   | 8.28   |
| 13-Methyl-1-hentriacontene                                                     | C <sub>32</sub> H <sub>64</sub>   | 448                     | 52.9 | 46.8   | 38.5   | 27.3   | 30.7   | 33.5   | 30.8   |
| 1,1,3,6-tetramethyl-2-(3,6,10,13,14-pentamethyl-3-ethyl-pentadecyl)cyclohexane | C <sub>32</sub> H <sub>64</sub>   | 448                     | 53.3 | 4.52   | 2.59   | 1.64   | 1.18   | 2.59   | 1.96   |
| Dotriacontane                                                                  | C <sub>32</sub> H <sub>66</sub>   | 450                     | 53.5 | 6.33   | 5.18   | 3.10   | 3.27   | 3.86   | 4.05   |
| 1-Tritriacontene                                                               | C <sub>33</sub> H <sub>66</sub>   | 462                     | 54.2 | 43.0   | 34.8   | 25.1   | 27.2   | 31.0   | 28.4   |
| Tritriacontane                                                                 | C <sub>33</sub> H <sub>68</sub>   | 464                     | 54.5 | 10.9   | 10.5   | 6.72   | 6.41   | 8.07   | 6.61   |
| 1-Tetratriacontene                                                             | C <sub>34</sub> H <sub>68</sub>   | 476                     | 55.4 | 41.5   | 32.1   | 23.5   | 26.5   | 28.0   | 27.3   |
| Tetratriacontane                                                               | C <sub>34</sub> H <sub>70</sub>   | 478                     | 56.1 | 5.47   | 4.87   | 2.94   | 3.92   | 2.60   | 3.27   |
| 17-Pentatriacontene                                                            | C <sub>35</sub> H <sub>70</sub>   | 490                     | 56.5 | 38.8   | 31.7   | 22.9   | 27.2   | 28.6   | 25.4   |
| Pentatriacontane                                                               | C <sub>35</sub> H <sub>72</sub>   | 492                     | 56.9 | 22.5   | 20.8   | 7.02   | 5.58   | 7.39   | 5.59   |
| 9,27-Hexatriacontadiene                                                        | C <sub>36</sub> H <sub>70</sub>   | 502                     | 57.6 | 40.4   | 31.3   | 22.7   | 21.7   | 25.4   | 25.5   |
| 1-Hexatriacontene                                                              | C <sub>36</sub> H <sub>72</sub>   | 505                     | 57.9 | 2.86   | 2.16   | 3.83   | 1.75   | 2.02   | 3.48   |
| Hexatriacontane                                                                | C <sub>36</sub> H <sub>74</sub>   | 507                     | 58.5 | 6.08   | 4.44   | 3.25   | 3.64   | 2.97   | 3.78   |
| 3,17-Dimethyl-1-pentatriacontene                                               | C <sub>37</sub> H <sub>74</sub>   | 519                     | 58.8 | 32.6   | 25.9   | 19.6   | 18.7   | 23.3   | 21.5   |
| Heptatriacontane                                                               | C <sub>37</sub> H <sub>76</sub>   | 521                     | 59.6 | 8.36   | 8.24   | 5.68   | 4.02   | 5.75   | 5.36   |
| 1-Octatriacontene                                                              | C <sub>38</sub> H <sub>76</sub>   | 533                     | 60.3 | 31.7   | 26.1   | 19.0   | 20.9   | 19.7   | 20.3   |
| Octatriacontane                                                                | C <sub>38</sub> H <sub>78</sub>   | 535                     | 60.9 | -      | 2.42   | 9.46   | -      | -      | -      |
| 1-Tetracontene                                                                 | C <sub>40</sub> H <sub>80</sub>   | 561                     | 61.6 | 3.78   | 3.11   | 2.79   | -      | -      | -      |
| Tetracontane                                                                   | C <sub>40</sub> H <sub>82</sub>   | 563                     | 61.9 | 25.7   | 18.7   | 16.9   | 13.3   | 17.1   | 15.6   |
| 1-Dotetracontene                                                               | C <sub>42</sub> H <sub>84</sub>   | 589                     | 63.1 | 5.74   | 5.09   | 3.48   | 2.47   | 3.73   | 3.64   |
| 15-Methylhentetracontane                                                       | C <sub>42</sub> H <sub>86</sub>   | 591                     | 63.4 | 20.4   | 17.2   | 13.7   | 12.4   | 13.4   | 14.7   |
| 1-Tetratetracontene                                                            | C <sub>44</sub> H <sub>88</sub>   | 617                     | 65.4 | -      | -      | 8.60   | -      | -      | -      |
| Tetratetracontane                                                              | C <sub>44</sub> H <sub>90</sub>   | 619                     | 65.9 | 24.1   | 17.7   | 15.9   | 13.7   | 13.5   | 13.0   |

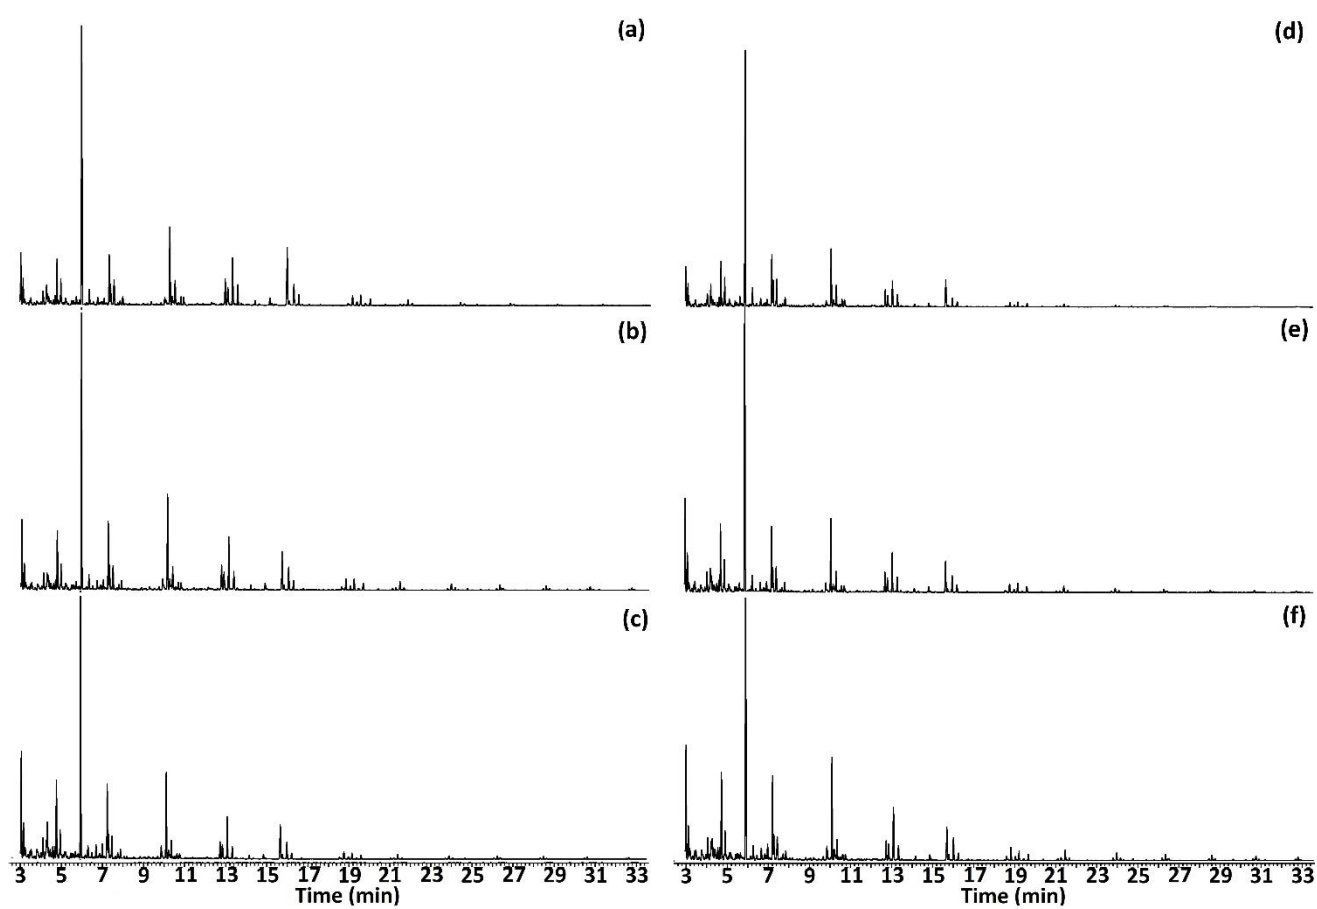

**Figure S5.** GC-MS chromatograms of impinger trap products of thermal pyrolysis of BMP at (a) 500 °C, (b) 550 °C, (c) 600 °C and CMP at (d) 500 °C, (e) 550 °C, and (f) 600 °C.

**Table S3.** Identified compounds collected in an impinger of thermal pyrolysis of BMP and CMP at 500, 550, and 600 °C. The units are mg compound / g resultant product.

| Compound Name                                                    | Formula                                      | M <sup>+</sup><br>(m/z) | RT   | BMP500 | BMP550 | BMP600 | CMP500 | CMP550 | CMP600 |
|------------------------------------------------------------------|----------------------------------------------|-------------------------|------|--------|--------|--------|--------|--------|--------|
|                                                                  |                                              |                         | Min  | mg/g   | mg/g   | mg/g   | mg/g   | mg/g   | mg/g   |
| 1-Heptene                                                        | C <sub>7</sub> H <sub>14</sub>               | 98                      | 3.05 | 53.1   | 109    | 194    | 79.8   | 168    | 198    |
| Heptane                                                          | C <sub>7</sub> H <sub>16</sub>               | 100                     | 3.16 | 27.1   | 44.5   | 66.7   | 49.8   | 71.7   | 64.1   |
| 3,5-Dimethylcyclopentene                                         | C <sub>7</sub> H <sub>12</sub>               | 96                      | 3.23 | 5.66   | 12.5   | 20.8   | 12.7   | 26.9   | 27.7   |
| 3-Hepten-1-ol                                                    | C <sub>7</sub> H <sub>14</sub> O             | 114                     | 3.39 | -      | 4.34   | 4.57   | 4.97   | 7.28   | 9.17   |
| 1-methyl-2-methylene-Cyclopentane,                               | C <sub>7</sub> H <sub>12</sub>               | 96                      | 3.48 | 3.50   | 8.24   | 11.6   | 6.77   | 12.4   | 16.5   |
| methyl-Cyclohexane                                               | C <sub>7</sub> H <sub>14</sub>               | 98                      | 3.53 | 8.18   | 13.6   | 16.4   | 16.4   | 23.5   | 42.2   |
| ethyl-Cyclopentane                                               | C <sub>7</sub> H <sub>14</sub>               | 98                      | 3.7  | -      | 6.06   | 8.60   | 7.95   | 9.47   | 26.29  |
| 3-methyl-Cyclohexene                                             | C <sub>7</sub> H <sub>12</sub>               | 96                      | 3.81 | -      | 8.08   | 17.9   | 14.9   | 26.4   | 39.9   |
| Methylenecyclooctane                                             | C <sub>9</sub> H <sub>16</sub>               | 112                     | 3.85 | -      | 8.66   | 14.7   | -      | -      | -      |
| 2-methyl-2-Hexen-4-yne                                           | C <sub>7</sub> H <sub>10</sub>               | 94                      | 3.96 | -      | -      | 2.38   | -      | -      | -      |
| 5-Methyl-1,5-hexadien-3-ol                                       | C <sub>7</sub> H <sub>12</sub> O             | 112                     | 4    | 2.27   | 6.62   | 8.71   | 6.08   | 7.21   | 9.63   |
| 4-methyl-1-Heptene                                               | C <sub>8</sub> H <sub>16</sub>               | 112                     | 4.11 | 17.5   | 36.9   | 46.4   | 39.5   | 49.4   | 55.2   |
| 4-methyl-Heptane                                                 | C <sub>8</sub> H <sub>18</sub>               | 114                     | 4.27 | 18.2   | 27.9   | 36.2   | 50.5   | 46.0   | 35.4   |
| Toluene                                                          | C <sub>7</sub> H <sub>8</sub>                | 92                      | 4.32 | 9.36   | 16.6   | 57.4   | 13.8   | 26.4   | 38.6   |
| Methylene-Cyclohexane-                                           | C <sub>7</sub> H <sub>12</sub>               | 96                      | 4.37 | 7.29   | 14.1   | 12.1   | 15.4   | 18.2   | 20.9   |
| (2,2-dimethylpropylidene)-                                       | C <sub>8</sub> H <sub>14</sub>               | 110                     | 4.44 | -      | -      | -      | 13.9   | 20.5   | 28.1   |
| Cyclopropane                                                     |                                              |                         |      |        |        |        |        |        |        |
| (E)-1,4,9-Decatriene                                             | C <sub>10</sub> H <sub>16</sub>              | 136                     | 4.61 | -      | 11.4   | 20.6   | 12.9   | 18.5   | 24.1   |
| 2-methyl-1-Heptene                                               | C <sub>8</sub> H <sub>16</sub>               | 112                     | 4.68 | 9.02   | 12.9   | 18.9   | 17.5   | 21.3   | 22.9   |
| 1-Octene                                                         | C <sub>8</sub> H <sub>16</sub>               | 112                     | 4.77 | 44.6   | 83.7   | 133    | 96.4   | 130    | 147    |
| 1,2,3-trimethyl-Cyclopentene                                     | C <sub>8</sub> H <sub>14</sub>               | 110                     | 4.91 | 3.03   | 6.76   | -      | 9.74   | 11.4   | 5.46   |
| Octane                                                           | C <sub>8</sub> H <sub>18</sub>               | 114                     | 4.95 | 24.5   | 35.1   | 46.4   | 60.7   | 57.0   | 40.4   |
| 1,3-Dimethyl-1-cyclohexene                                       | C <sub>8</sub> H <sub>14</sub>               | 110                     | 4.98 | -      | -      | -      | 8.03   | 6.85   | 4.63   |
| (Z)-3-Octene,                                                    | C <sub>8</sub> H <sub>16</sub>               | 112                     | 5.08 | -      | -      | -      | 8.31   | 6.49   | 4.97   |
| 1,4-dimethyl-cis-Cyclohexane                                     | C <sub>8</sub> H <sub>16</sub>               | 112                     | 5.12 | 2.84   | 5.52   | 4.87   | 16.1   | 13.1   | 8.30   |
| 1,1,3,4-tetramethyl-cis-Cyclopentane                             | C <sub>9</sub> H <sub>18</sub>               | 126                     | 5.18 | 6.44   | 6.29   | 8.89   | 9.60   | 8.48   | 7.67   |
| 3,3,5-trimethyl-1-Hexene                                         | C <sub>9</sub> H <sub>18</sub>               | 126                     | 5.24 | 2.97   | 6.27   | 10.2   | 5.15   | 5.56   | 3.37   |
| 2,3-Dimethyl-cyclohexa-1,3-diene                                 | C <sub>8</sub> H <sub>12</sub>               | 108                     | 5.31 | -      | -      | 2.52   | -      | -      | -      |
| 2,4-dimethyl-Heptane                                             | C <sub>9</sub> H <sub>20</sub>               | 128                     | 5.47 | 4.85   | 6.12   | 8.47   | 14.1   | 13.1   | 8.09   |
| 1-Methyl-2-methylenecyclohexane                                  | C <sub>8</sub> H <sub>14</sub>               | 110                     | 5.55 | 3.94   | 7.94   | 7.86   | 10.9   | 12.5   | 8.60   |
| 1,2-dimethyl-4-methylene-                                        | C <sub>8</sub> H <sub>12</sub>               | 108                     | 5.62 | -      | -      | 5.08   | 3.87   | 7.12   | 5.98   |
| Cyclopentene                                                     |                                              |                         |      |        |        |        |        |        |        |
| 1,3,5-trimethyl-Cyclohexane                                      | C <sub>9</sub> H <sub>18</sub>               | 126                     | 5.69 | 7.98   | 10.3   | 10.2   | 20.9   | 17.8   | 10.0   |
| 2-oxo-3-Cyclopentene-1-acetaldehyde                              | C <sub>7</sub> H <sub>8</sub> O <sub>2</sub> | 124                     | 5.84 | 4.52   | 3.33   | -      | -      | -      | -      |
| 2,4-Dimethyl-1-heptene                                           | C <sub>9</sub> H <sub>18</sub>               | 126                     | 5.96 | 324    | 475    | 589    | 653    | 600    | 554    |
| 1,2-Dipropylcyclopropene                                         | C <sub>9</sub> H <sub>16</sub>               | 124                     | 6.19 | -      | -      | 7.51   | 10.2   | 8.24   | 11.8   |
| 1,3,5-trimethyl-(1 $\alpha$ ,3 $\alpha$ ,5 $\beta$ )-Cyclohexane | C <sub>9</sub> H <sub>18</sub>               | 126                     | 6.31 | 16.4   | 24.3   | 24.7   | 45.3   | 32.2   | 28.3   |
| Ethylbenzene                                                     | C <sub>8</sub> H <sub>10</sub>               | 106                     | 6.5  | 3.14   | 4.95   | 9.40   | 8.15   | 6.51   | 7.50   |
| 5-Ethylcyclopent-1-enecarboxaldehyde                             | C <sub>8</sub> H <sub>12</sub> O             | 124                     | 6.71 | 9.82   | 20.1   | 27.4   | 22.3   | 19.8   | 24.5   |
| Cyclohexanemethanol                                              | C <sub>7</sub> H <sub>14</sub> O             | 114                     | 6.89 | 4.67   | -      | 11.2   | 9.98   | 9.51   | 13.2   |
| 3,3,5-trimethyl-Cyclohexene                                      | C <sub>9</sub> H <sub>16</sub>               | 124                     | 6.96 | 3.62   | -      | 3.75   | 8.81   | 5.19   | 5.81   |
| Bicyclo[6.1.0]nonane                                             | C <sub>9</sub> H <sub>16</sub>               | 124                     | 7.03 | 5.85   | 14.1   | 24.4   | 12.5   | 17.5   | 24.4   |
| 2-ethyl-1,1-dimethyl-Cyclopentane                                | C <sub>9</sub> H <sub>18</sub>               | 126                     | 7.08 | -      | -      | -      | 6.12   | 4.09   | 145    |

| Compound Name                                     | Formula                                        | M <sup>+</sup><br>(m/z) | RT    | BMP500 | BMP550 | BMP600 | CMP500 | CMP550 | CMP600 |
|---------------------------------------------------|------------------------------------------------|-------------------------|-------|--------|--------|--------|--------|--------|--------|
|                                                   |                                                |                         | Min   | mg/g   | mg/g   | mg/g   | mg/g   | mg/g   | mg/g   |
| 1-Nonene                                          | C <sub>9</sub> H <sub>18</sub>                 | 126                     | 7.26  | 53.3   | 99.4   | 137    | 107    | 116    | 45.8   |
| 3-Ethyl-4-methylpentan-1-ol                       | C <sub>8</sub> H <sub>18</sub> O               | 130                     | 7.32  | 21.9   | 31.6   | 51.2   | 51.3   | 49.3   | 53.6   |
| Nonane                                            | C <sub>9</sub> H <sub>20</sub>                 | 128                     | 7.49  | 28.9   | 48.1   | 48.7   | 64.4   | 54.9   | -      |
| cis-2-Nonene                                      | C <sub>9</sub> H <sub>18</sub>                 | 126                     | 7.67  | 3.37   | 5.33   | 5.69   | 9.56   | 7.48   | 7.72   |
| cyclopropyl-Cyclohexane                           | C <sub>9</sub> H <sub>16</sub>                 | 124                     | 7.78  | 4.91   | 9.52   | 12.1   | 7.21   | 12.4   | 15.5   |
| 6,7-dimethyl Bicyclo[4.2.0.]octane                | C <sub>10</sub> H <sub>18</sub>                | 138                     | 7.87  | -      | -      | -      | 19.9   | 20.2   | 5.3    |
| 2,7-dimethyl-1,7-Octadiene                        | C <sub>10</sub> H <sub>18</sub>                | 138                     | 7.91  | 8.65   | 13.9   | 16.6   | 3.58   | -      | -      |
| 2-propenyl-Cyclohexane                            | C <sub>9</sub> H <sub>16</sub>                 | 124                     | 8.09  | -      | -      | 4.16   | 3.74   | 2.80   | 18.3   |
| octahydro-(1α,1bβ,4α,5α)-Pentaleno[1,2-b]oxirene, | C <sub>8</sub> H <sub>12</sub> O               | 124                     | 8.22  | 1.71   | -      | 4.58   | 4.95   | 3.44   | 4.86   |
| trans-1,2-Diethyl cyclopentane                    | C <sub>9</sub> H <sub>18</sub>                 | 126                     | 8.64  | -      | 1.94   | 2.40   | 2.92   | 2.57   | 2.98   |
| 1-butyl-Cyclopentene                              | C <sub>9</sub> H <sub>16</sub>                 | 124                     | 8.88  | -      | 4.66   | 6.53   | 6.58   | 5.86   | 1.72   |
| 1-Undecanol                                       | C <sub>11</sub> H <sub>24</sub> O              | 172                     | 8.99  | -      | -      | -      | 5.81   | 2.94   | 6.20   |
| 2,3-dimethyl-Octane                               | C <sub>10</sub> H <sub>22</sub>                | 142                     | 9.27  | 2.74   | 3.90   | 3.04   | 7.62   | 4.05   | 2.56   |
| 1-methyl-4-(1-methylethenyl)-trans-Cyclohexane    | C <sub>10</sub> H <sub>18</sub>                | 138                     | 9.74  | 1.99   | 3.78   | 7.30   | 4.00   | 4.38   | 5.57   |
| (Z)-Cyclodecene                                   | C <sub>10</sub> H <sub>18</sub>                | 138                     | 9.91  | 8.16   | 15.6   | 20.9   | 15.6   | 17.3   | 25.9   |
| Phenol                                            | C <sub>6</sub> H <sub>6</sub> O                | 94                      | 9.96  | 6.54   | 9.04   | -      | 6.15   | -      | -      |
| 1-Decene                                          | C <sub>10</sub> H <sub>20</sub>                | 140                     | 10.2  | 86.8   | 156    | 173    | 135    | 146    | 192    |
| 6-methyl-2-Hepten-4-one                           | C <sub>8</sub> H <sub>14</sub> O               | 126                     | 10.3  | 9.21   | 14.5   | 19.1   | 14.2   | 16.4   | 19.7   |
| Decane                                            | C <sub>10</sub> H <sub>22</sub>                | 142                     | 10.4  | 27.5   | 38.1   | 31.0   | 49.8   | 42.2   | 37.9   |
| 4-methyl-1-Decene                                 | C <sub>11</sub> H <sub>22</sub>                | 154                     | 10.5  | -      | -      | 2.67   | 2.79   | 3.87   | 6.55   |
| trans-Hexahydrophthalide                          | C <sub>8</sub> H <sub>12</sub> O <sub>2</sub>  | 140                     | 10.6  | 3.46   | 5.43   | 4.60   | 6.03   | 6.91   | 11.4   |
| 2,6-dimethyl-Nonane                               | C <sub>11</sub> H <sub>24</sub>                | 156                     | 10.7  | 10.1   | 13.6   | 11.2   | 17.9   | 15.8   | 16.4   |
| 4-methyl-Decane                                   | C <sub>11</sub> H <sub>24</sub>                | 156                     | 10.8  | 9.54   | 16.3   | 12.7   | 19.9   | 16.3   | 17.6   |
| 2-ethyl-1-Hexanol                                 | C <sub>8</sub> H <sub>18</sub> O               | 130                     | 11.5  | 2.41   | 3.08   | 2.43   | 4.55   | 3.99   | 3.74   |
| 1-Methylpentyl cyclopropane                       | C <sub>9</sub> H <sub>18</sub>                 | 126                     | 11.7  | 1.63   | 3.86   | 2.52   | 2.72   | -      | -      |
| 3-pentyl-(2Z)-2,4-Pentadien-1-ol                  | C <sub>10</sub> H <sub>18</sub> O              | 154                     | 12.15 | 3.44   | 6.69   | 5.67   | 4.29   | -      | -      |
| 2,4-dimethyl-2-Decene                             | C <sub>12</sub> H <sub>24</sub>                | 168                     | 12.2  | -      | -      | -      | 6.15   | -      | -      |
| Tetrahydrogeranyl formate                         | C <sub>11</sub> H <sub>22</sub> O <sub>2</sub> | 186                     | 12.8  | 30.9   | 41.3   | 34.3   | 39.8   | 40.8   | 34.5   |
| 1,11-Dodecadiene                                  | C <sub>12</sub> H <sub>22</sub>                | 166                     | 12.9  | 26.5   | 34.8   | 31.5   | 32.7   | 35.4   | 34.6   |
| 1-Dodecene                                        | C <sub>12</sub> H <sub>24</sub>                | 168                     | 13.2  | 56.7   | 90.9   | 86.4   | 62.6   | 82.2   | 103    |
| Dodecane                                          | C <sub>12</sub> H <sub>26</sub>                | 170                     | 13.4  | 23.4   | 30.9   | 23.8   | 29.2   | 31.5   | 26.5   |
| (E)-Tetradec-2-enal                               | C <sub>14</sub> H <sub>26</sub> O              | 210                     | 13.6  | -      | -      | 4.73   | 2.90   | 4.89   | 4.27   |
| 3,7,11-trimethyl-1-Dodecanol                      | C <sub>15</sub> H <sub>32</sub> O              | 228                     | 14.2  | 5.71   | 8.31   | 7.04   | -      | 9.32   | 9.55   |
| 2,6,6-trimethyl-Bicyclo[3.1.1]heptane             | C <sub>10</sub> H <sub>18</sub>                | 138                     | 14.9  | 8.51   | 11.4   | 8.83   | 9.58   | 12.3   | 10.9   |
| 2-Isopropenyl-5-methylhex-4-enal                  | C <sub>10</sub> H <sub>16</sub> O              | 152                     | 14.9  | -      | -      | -      | -      | 4.62   | 3.07   |
| (E)-3-Tetradecene                                 | C <sub>14</sub> H <sub>28</sub>                | 196                     | 15.9  | 3.63   | 7.43   | 7.15   | 7.17   | 7.30   | 11.8   |
| 1-Tetradecene                                     | C <sub>14</sub> H <sub>28</sub>                | 196                     | 16.1  | 25.6   | 40.7   | 33.6   | 23.9   | 36.5   | 47.9   |
| Tetradecane                                       | C <sub>14</sub> H <sub>30</sub>                | 198                     | 16.3  | 13.2   | 16.5   | 11.8   | 12.8   | 17.1   | 14.8   |
| (1,2-dimethylpropyl)-Cyclohexane                  | C <sub>11</sub> H <sub>22</sub>                | 154                     | 16.8  | 1.83   | 2.40   | 1.87   | 2.15   | -      | -      |
| 2,3-dihydro-Benzofuran                            | C <sub>8</sub> H <sub>8</sub> O                | 120                     | 16.9  | 0.75   | 1.36   | 0.88   | -      | -      | -      |
| 1-Ethyl-2,2,6-trimethylcyclohexane                | C <sub>11</sub> H <sub>22</sub>                | 154                     | 18.2  | 0.79   | 1.06   | -      | -      | -      | -      |
| 8-Dodecenol                                       | C <sub>12</sub> H <sub>24</sub> O              | 152                     | 18.7  | 2.46   | 4.68   | 4.71   | 1.59   | 4.83   | 7.27   |
| Hydroquinone                                      | C <sub>6</sub> H <sub>6</sub> O <sub>2</sub>   | 110                     | 18.7  | 1.09   | 1.89   | 1.58   | 10.5   | 18.7   | 26.2   |
| 1-Tridecene                                       | C <sub>13</sub> H <sub>26</sub>                | 182                     | 18.9  | 11.5   | 19.9   | 14.73  | -      | -      | -      |
| Tridecane                                         | C <sub>13</sub> H <sub>28</sub>                | 184                     | 19.1  | 5.23   | 7.07   | 4.60   | 5.40   | 7.62   | 7.37   |



| Compound Name                               | Formula                                        | M <sup>+</sup><br>(m/z) | RT   | BMP500 | BMP550 | BMP600 | CMP500 | CMP550 | CMP600 |
|---------------------------------------------|------------------------------------------------|-------------------------|------|--------|--------|--------|--------|--------|--------|
|                                             |                                                |                         | Min  | mg/g   | mg/g   | mg/g   | mg/g   | mg/g   | mg/g   |
| 2-butyl-1-Octanol                           | C <sub>12</sub> H <sub>26</sub> O              | 186                     | 19.3 | 13.8   | 20.1   | 13.4   | 12.9   | 20.2   | 19.4   |
| 1-Dodecanol                                 | C <sub>12</sub> H <sub>26</sub> O              | 186                     | 19.5 | 3.07   | 4.18   | 2.58   | 3.48   | 4.20   | 4.08   |
| 5-methyl-2-(1-methylethyl)-1-Hexanolacetate | C <sub>12</sub> H <sub>24</sub> O <sub>2</sub> | 200                     | 19.7 | 8.48   | 12.6   | 8.12   | 8.48   | 13.2   | 12.2   |
| 2-Methyl-1-undecanol                        | C <sub>12</sub> H <sub>26</sub> O              | 186                     | 20.5 | 1.64   | 2.06   | -      | -      | -      | -      |
| 1,14-Tetradecanediol                        | C <sub>14</sub> H <sub>30</sub> O <sub>2</sub> | 230                     | 21.2 | 1.91   | 3.28   | 1.44   | 2.74   | 3.32   | 3.89   |
| 1,13-Tetradecadiene                         | C <sub>14</sub> H <sub>26</sub>                | 194                     | 21.3 | 1.87   | 4.48   | 3.04   | 2.42   | 4.07   | 6.73   |
| 1-Pentadecyne                               | C <sub>15</sub> H <sub>28</sub>                | 208                     | 21.5 | 7.18   | 15.7   | 9.78   | 6.94   | 14.2   | 21.3   |
| E-10-Pentadecanol                           | C <sub>15</sub> H <sub>30</sub> O              | 226                     | 21.7 | 2.71   | 4.17   | 2.21   | 3.12   | 4.98   | 5.34   |
| (Z)-11-Hexadecen-1-ol                       | C <sub>16</sub> H <sub>32</sub> O              | 240                     | 23.9 | 1.25   | 3.77   | 1.97   | 1.34   | 2.77   | 5.08   |
| 1-Hexadecanol                               | C <sub>16</sub> H <sub>34</sub> O              | 242                     | 24.1 | 4.20   | 11.9   | 7.02   | 4.63   | 9.67   | 17.3   |
| 1-Pentadecene                               | C <sub>15</sub> H <sub>30</sub>                | 210                     | 24.2 | 1.99   | 3.80   | 2.11   | 2.65   | 3.77   | 5.38   |
| 2-Hexyl-1-decanol                           | C <sub>16</sub> H <sub>34</sub> O              | 242                     | 24.4 | 1.26   | 0.73   | -      | -      | -      | -      |
| 2-Hexyl-1-octanol                           | C <sub>14</sub> H <sub>30</sub> O              | 214                     | 24.8 | 0.61   | 3.18   | -      | -      | -      | -      |
| Hexadecadiene                               | C <sub>16</sub> H <sub>30</sub>                | 222                     | 26.2 | 0.77   | 2.99   | 2.28   | -      | -      | -      |
| 1-Hexadecene                                | C <sub>16</sub> H <sub>32</sub>                | 224                     | 26.4 | 2.72   | 9.26   | 5.86   | -      | 6.87   | 12.68  |
| hexadecyl-Oxirane                           | C <sub>18</sub> H <sub>36</sub> O              | 268                     | 26.5 | 1.00   | 2.15   | 1.32   | -      | -      | -      |
| Hexadecane                                  | C <sub>16</sub> H <sub>34</sub>                | 226                     | 26.6 | 1.27   | 3.46   | 1.71   | -      | -      | -      |
| n-Heptadecadiene                            | C <sub>17</sub> H <sub>32</sub>                | 236                     | 28.5 | 0.68   | 2.74   | 2.29   | -      | -      | -      |
| 1-Heptadecene                               | C <sub>17</sub> H <sub>34</sub>                | 238                     | 28.7 | 2.04   | 7.70   | 5.76   | -      | 5.74   | 11.3   |
| Heptadecane                                 | C <sub>17</sub> H <sub>36</sub>                | 240                     | 28.8 | 0.85   | 2.95   | 1.67   | -      | -      | -      |
| 2-methyl-1-Hexadecanol                      | C <sub>17</sub> H <sub>36</sub> O              | 256                     | 29.7 | 0.72   | 2.42   | -      | -      | -      | -      |
| 4-Hexyldecan-1-ol                           | C <sub>16</sub> H <sub>34</sub> O              | 242                     | 30.7 | 0.51   | 2.09   | 1.78   | -      | -      | -      |
| 1-Octadecene                                | C <sub>18</sub> H <sub>36</sub>                | 252                     | 30.8 | 1.63   | 5.97   | 4.74   | -      | 4.47   | 9.45   |
| Octadecane                                  | C <sub>18</sub> H <sub>38</sub>                | 254                     | 30.9 | 0.85   | 2.26   | 1.45   | -      | -      | -      |
| Cyclododecanemethanol                       | C <sub>13</sub> H <sub>26</sub> O              | 198                     | 31.2 | 0.46   | 1.88   | -      | -      | -      | -      |
| 8,11-Nonadecadiene                          | C <sub>19</sub> H <sub>36</sub>                | 264                     | 32.7 | 0.32   | 1.59   | 1.69   | -      | -      | -      |
| 1-Nonadecene                                | C <sub>19</sub> H <sub>38</sub>                | 266                     | 32.9 | 1.13   | 4.26   | 3.70   | -      | -      | 7.21   |
| Nonadecane                                  | C <sub>19</sub> H <sub>40</sub>                | 268                     | 32.9 | 0.71   | 1.69   | 1.44   | -      | -      | -      |

**Table S4.** Identified compounds in gasoline used as a standard. The units are mg compound per g resultant liquid product.

| Compound Name                    | M+  | Formula                         | RT min | Gasoline mg/g |
|----------------------------------|-----|---------------------------------|--------|---------------|
| 2,2-Dimethylbutane               | 86  | C <sub>6</sub> H <sub>14</sub>  | 1.99   | 19.7          |
| 3-methylene-Pentane              | 84  | C <sub>6</sub> H <sub>12</sub>  | 2.10   | 29.6          |
| methyl-Cyclopentane              | 84  | C <sub>6</sub> H <sub>12</sub>  | 2.35   | 32.4          |
| 2,4-dimethyl-Pentane             | 100 | C <sub>7</sub> H <sub>16</sub>  | 2.71   | 73.9          |
| 3-ethyl-Pentane                  | 100 | C <sub>7</sub> H <sub>16</sub>  | 2.81   | 32.3          |
| 2,2,3,3-Tetramethylbutane        | 114 | C <sub>8</sub> H <sub>18</sub>  | 2.97   | 65.8          |
| 3-methyl-Hexane                  | 100 | C <sub>7</sub> H <sub>16</sub>  | 3.13   | 25.2          |
| 3,3-dimethyl-1,4-Pentadiene      | 96  | C <sub>7</sub> H <sub>12</sub>  | 3.20   | 6.79          |
| methyl-Cyclohexane               | 95  | C <sub>7</sub> H <sub>14</sub>  | 3.50   | 23.1          |
| 2,5-dimethyl-Hexane              | 114 | C <sub>8</sub> H <sub>18</sub>  | 3.59   | 6.46          |
| 2,4-dimethyl-Hexane              | 114 | C <sub>8</sub> H <sub>18</sub>  | 3.63   | 11.6          |
| 1,2,4-trimethyl-Cyclopentane     | 112 | C <sub>8</sub> H <sub>18</sub>  | 3.77   | 4.72          |
| 3-Ethylpentane                   | 100 | C <sub>7</sub> H <sub>16</sub>  | 3.92   | 19.7          |
| 2,3,3-Trimethylpentane           | 114 | C <sub>8</sub> H <sub>18</sub>  | 4.02   | 14.2          |
| 2,3-Dimethylhexane               | 114 | C <sub>8</sub> H <sub>18</sub>  | 4.11   | 9.73          |
| 2-Methylheptane                  | 114 | C <sub>8</sub> H <sub>18</sub>  | 4.22   | 21.5          |
| Toluene                          | 92  | C <sub>7</sub> H <sub>8</sub>   | 4.31   | 104           |
| 3-Methylheptane                  | 114 | C <sub>8</sub> H <sub>18</sub>  | 4.37   | 21.9          |
| 1,3-dimethyl-trans-Cyclohexane   | 112 | C <sub>8</sub> H <sub>16</sub>  | 4.49   | 6.27          |
| 2,2,4-Trimethylhexane            | 128 | C <sub>9</sub> H <sub>20</sub>  | 4.55   | 7.25          |
| Ethylcyclohexane                 | 112 | C <sub>8</sub> H <sub>16</sub>  | 4.69   | 3.27          |
| 3-Ethylhexane                    | 114 | C <sub>8</sub> H <sub>18</sub>  | 4.93   | 17.6          |
| 1,4-Dimethylcyclohexane          | 112 | C <sub>8</sub> H <sub>16</sub>  | 5.07   | 4.13          |
| 1,4-dimethyl-cis-Cyclohexane     | 112 | C <sub>8</sub> H <sub>16</sub>  | 5.18   | 3.21          |
| 2,3-Dimethylheptane              | 128 | C <sub>9</sub> H <sub>20</sub>  | 5.28   | 1.85          |
| 2,4-dimethyl-Heptane             | 128 | C <sub>9</sub> H <sub>20</sub>  | 5.45   | 3.39          |
| 2-Methyloctane                   | 128 | C <sub>9</sub> H <sub>20</sub>  | 5.60   | 4.00          |
| 3,5-Dimethylheptane              | 128 | C <sub>9</sub> H <sub>20</sub>  | 5.76   | 9.34          |
| 1,2,4-Trimethylcyclohexane       | 126 | C <sub>9</sub> H <sub>18</sub>  | 6.18   | 1.68          |
| 3-Ethyl-2,4-dimethylpentane      | 128 | C <sub>9</sub> H <sub>20</sub>  | 6.30   | 2.66          |
| Ethylbenzene                     | 106 | C <sub>8</sub> H <sub>10</sub>  | 6.49   | 48.5          |
| p-Xylene                         | 106 | C <sub>8</sub> H <sub>10</sub>  | 6.71   | 129           |
| 2,2,3-Trimethyldecane            | 184 | C <sub>13</sub> H <sub>28</sub> | 6.86   | 3.11          |
| 2,2-Dimethyloctane               | 142 | C <sub>10</sub> H <sub>22</sub> | 7.05   | 4.00          |
| 1-ethyl-2-methyl-cis-Cyclohexane | 126 | C <sub>9</sub> H <sub>18</sub>  | 7.14   | 2.54          |
| o-Xylene                         | 106 | C <sub>8</sub> H <sub>10</sub>  | 7.34   | 49.4          |
| 1-Nonene                         | 126 | C <sub>9</sub> H <sub>18</sub>  | 7.47   | 9.35          |
| 1-ethyl-2-methyl-Cyclohexane     | 128 | C <sub>9</sub> H <sub>20</sub>  | 7.67   | 2.19          |
| 2,3-Dimethyloctane               | 142 | C <sub>10</sub> H <sub>22</sub> | 7.91   | 1.70          |
| 2,4,6-Trimethylheptane           | 142 | C <sub>10</sub> H <sub>22</sub> | 7.96   | 1.33          |
| 4-Methylnonane                   | 142 | C <sub>10</sub> H <sub>22</sub> | 8.18   | 2.14          |
| Cumene                           | 120 | C <sub>9</sub> H <sub>12</sub>  | 8.22   | 3.41          |
| 2,6-Dimethyloctane               | 142 | C <sub>10</sub> H <sub>22</sub> | 8.43   | 3.73          |
| 3,4,5-trimethyl-Heptane          | 142 | C <sub>10</sub> H <sub>22</sub> | 8.6    | 1.63          |
| 3-Ethyl-2-methylheptane          | 142 | C <sub>10</sub> H <sub>22</sub> | 8.65   | 0.91          |
| Propylbenzene                    | 120 | C <sub>9</sub> H <sub>12</sub>  | 9.07   | 15.0          |
| 2,2,6-Trimethyloctane            | 156 | C <sub>11</sub> H <sub>24</sub> | 9.21   | 9.50          |
| 1-ethyl-3-methyl-Benzene         | 120 | C <sub>9</sub> H <sub>12</sub>  | 9.30   | 64.5          |
| 1-ethyl-4-methyl-Benzene         | 120 | C <sub>9</sub> H <sub>12</sub>  | 9.50   | 26.6          |
| 1-ethyl-2-methyl-Benzene         | 120 | C <sub>9</sub> H <sub>12</sub>  | 9.84   | 16.3          |
| Mesitylene                       | 120 | C <sub>9</sub> H <sub>12</sub>  | 10.25  | 64.0          |
| Decane                           | 142 | C <sub>10</sub> H <sub>22</sub> | 10.39  | 6.14          |
| Isobutylbenzene                  | 134 | C <sub>10</sub> H <sub>14</sub> | 10.65  | 1.25          |
| Sec-butylbenzene                 | 134 | C <sub>10</sub> H <sub>14</sub> | 10.75  | 1.84          |
| 1,2,4-Trimethylbenzene           | 120 | C <sub>9</sub> H <sub>12</sub>  | 11.11  | 17.9          |
| Allylbenzene                     | 118 | C <sub>9</sub> H <sub>10</sub>  | 11.42  | 2.02          |
| Indane                           | 118 | C <sub>9</sub> H <sub>10</sub>  | 11.52  | 7.15          |
| 1,3-Diethylbenzene               | 134 | C <sub>10</sub> H <sub>14</sub> | 11.92  | 3.75          |
| 1-Methyl-3-propylbenzene         | 134 | C <sub>10</sub> H <sub>14</sub> | 11.97  | 12.4          |

| Compound Name                                         | M+  | Formula                         | RT min | Gasoline mg/g |
|-------------------------------------------------------|-----|---------------------------------|--------|---------------|
| 4-methylene-1-(1-methylethyl)-Bicyclo[3.1.0]hex-2-ene | 134 | C <sub>10</sub> H <sub>14</sub> | 12.11  | 9.98          |
| 2-Ethyl-p-xylene                                      | 134 | C <sub>10</sub> H <sub>14</sub> | 12.19  | 12.2          |
| 2-Methyldecane                                        | 156 | C <sub>11</sub> H <sub>24</sub> | 12.30  | 4.04          |
| 1-Methyl-2-propylbenzene                              | 134 | C <sub>10</sub> H <sub>14</sub> | 12.44  | 3.05          |
| 3-Methyldecane                                        | 156 | C <sub>11</sub> H <sub>24</sub> | 12.50  | 1.90          |
| 1-Ethyl-2,4-dimethylbenzene                           | 134 | C <sub>10</sub> H <sub>14</sub> | 12.75  | 6.58          |
| 4-ethyl-1,2-dimethyl-Benzene                          | 134 | C <sub>10</sub> H <sub>14</sub> | 12.80  | 5.60          |
| 4-Allyltoluene                                        | 132 | C <sub>10</sub> H <sub>12</sub> | 12.87  | 0.99          |
| p-Cymene                                              | 134 | C <sub>10</sub> H <sub>14</sub> | 12.99  | 13.8          |
| O-Cymene                                              | 134 | C <sub>10</sub> H <sub>14</sub> | 13.20  | 0.70          |
| Undecane                                              | 156 | C <sub>11</sub> H <sub>24</sub> | 13.38  | 3.15          |
| 1-methyl-4-(2-methylpropyl)-Benzene                   | 148 | C <sub>11</sub> H <sub>16</sub> | 13.46  | 0.86          |
| (1,1-dimethylpropyl)-Benzene                          | 148 | C <sub>11</sub> H <sub>16</sub> | 13.55  | 0.91          |
| 1-Ethyl-3,5-dimethylbenzene                           | 134 | C <sub>10</sub> H <sub>14</sub> | 13.63  | 2.30          |
| trans-4a-Methyl-decahydronaphthalene                  | 152 | C <sub>11</sub> H <sub>20</sub> | 13.72  | 0.52          |
| 1,2,4,5-Tetramethylbenzene                            | 134 | C <sub>10</sub> H <sub>14</sub> | 14.04  | 9.34          |
| 3,7-Dimethyldecane                                    | 170 | C <sub>12</sub> H <sub>26</sub> | 14.18  | 0.69          |
| 1-Methyl-4-(1-methylpropyl)-benzene                   | 148 | C <sub>11</sub> H <sub>16</sub> | 14.52  | 1.71          |
| 5-Methylindan                                         | 132 | C <sub>10</sub> H <sub>12</sub> | 14.60  | 4.01          |
| 1,3-Diethyl-4-methylbenzene                           | 148 | C <sub>11</sub> H <sub>16</sub> | 14.71  | 1.52          |
| 3,5-Diethyltoluene                                    | 148 | C <sub>11</sub> H <sub>16</sub> | 14.75  | 2.18          |
| 1-Methylindan                                         | 132 | C <sub>10</sub> H <sub>12</sub> | 14.93  | 5.06          |
| 1,4-Diethylbenzene                                    | 132 | C <sub>10</sub> H <sub>12</sub> | 14.98  | 4.55          |
| Isopentylbenzene                                      | 148 | C <sub>11</sub> H <sub>16</sub> | 15.12  | 2.20          |
| 2,4-dimethyl-1-(1-methylethyl)-Benzene                | 148 | C <sub>11</sub> H <sub>16</sub> | 15.28  | 3.08          |
| 1,4-Diethyl-2-methylbenzene                           | 148 | C <sub>11</sub> H <sub>16</sub> | 15.36  | 0.76          |
| 3-Methylundecane                                      | 170 | C <sub>12</sub> H <sub>26</sub> | 15.45  | 0.98          |
| 1-methyl-4-(1-methyl-2-propenyl)-Benzene              | 146 | C <sub>11</sub> H <sub>14</sub> | 15.87  | 0.59          |
| Naphthalene                                           | 128 | C <sub>10</sub> H <sub>8</sub>  | 15.99  | 6.45          |
| 1,1-Dimethylindan                                     | 146 | C <sub>11</sub> H <sub>14</sub> | 16.00  | 1.79          |
| 2,3-dihydro-2,2-Dimethylindene                        | 146 | C <sub>11</sub> H <sub>14</sub> | 16.07  | 0.95          |
| pentamethyl-Benzene                                   | 148 | C <sub>11</sub> H <sub>16</sub> | 16.30  | 3.68          |
| 4,7-Dimethylindan                                     | 146 | C <sub>11</sub> H <sub>14</sub> | 17.78  | 2.42          |
| 1,6-Dimethylindan                                     | 146 | C <sub>11</sub> H <sub>14</sub> | 18.17  | 1.04          |
| 2-methyl-Naphthalene                                  | 142 | C <sub>11</sub> H <sub>10</sub> | 19.05  | 6.92          |
| 1-methyl-Naphthalene                                  | 142 | C <sub>11</sub> H <sub>10</sub> | 19.51  | 2.94          |
| 2-ethyl-Naphthalene                                   | 156 | C <sub>12</sub> H <sub>12</sub> | 21.71  | 0.68          |
| 2,6-dimethyl-Naphthalene                              | 156 | C <sub>12</sub> H <sub>12</sub> | 21.97  | 0.84          |
| 1,7-dimethyl-Naphthalene                              | 156 | C <sub>12</sub> H <sub>12</sub> | 22.35  | 0.91          |
| 1,5-dimethyl-Naphthalene                              | 156 | C <sub>12</sub> H <sub>12</sub> | 22.44  | 0.45          |

**Table S5.** Identified compounds in products of catalytic pyrolysis of BMP and CMP at 500,550, and 600 °C collected from the impinger. The units are mg compound per g resultant product.

| Compound Name             | Formula                        | M <sup>+</sup><br>(m/z) | RT   | BMP 500 | BMP 550 | BMP600 | CMP 500 | CMP 550 | CMP600 |
|---------------------------|--------------------------------|-------------------------|------|---------|---------|--------|---------|---------|--------|
|                           |                                |                         | Min  | mg/g    | mg/g    | mg/g   | mg/g    | mg/g    | mg/g   |
| 2-methyl-Pentane          | C <sub>6</sub> H <sub>14</sub> | 86                      | 1.93 | 15.2    | 147     | 143    | 342     | 299     | 254    |
| 3-methyl-Pentane          | C <sub>6</sub> H <sub>14</sub> | 86                      | 2.00 | 7.43    | 144     | 142    | 450     | 140     | 145    |
| n-Hexane                  | C <sub>6</sub> H <sub>14</sub> | 86                      | 2.11 | 6.20    | 92.1    | 92.0   | 240     | 48.7    | 27.1   |
| 3-methyl-(Z)-2-Pentene,   | C <sub>6</sub> H <sub>12</sub> | 84                      | 2.18 | 0.32    | 5.65    | 2.00   | 104     | 54.3    | 38.1   |
| 4-methyl-(Z)-2-Pentene    | C <sub>6</sub> H <sub>12</sub> | 84                      | 2.28 | 1.18    | 11.5    | 6.11   | 59.9    | 52.5    | 29.1   |
| (Z)-3-Hexene              | C <sub>6</sub> H <sub>12</sub> | 84                      | 2.22 | -       | -       | -      | -       | 21.15   | -      |
| methyl-Cyclopentane       | C <sub>6</sub> H <sub>12</sub> | 84                      | 2.35 | 1.53    | 24.3    | 20.3   | 90.9    | 32.1    | 37.8   |
| 4-Methyl-1,3-pentadiene   | C <sub>6</sub> H <sub>10</sub> | 82                      | 2.42 | -       | -       | -      | -       | -       | 8.02   |
| 1,3,5-Hexatriene          | C <sub>6</sub> H <sub>8</sub>  | 80                      | 2.46 | -       | -       | -      | -       | -       | 14.3   |
| (Z)-1,4-Hexadiene         | C <sub>6</sub> H <sub>10</sub> | 82                      | 2.59 | -       | -       | -      | 33.7    | 19.9    | 33.4   |
| Benzene                   | C <sub>6</sub> H <sub>6</sub>  | 78                      | 2.7  | 81.5    | 393     | 395    | 1162    | 497     | 817    |
| 3-methyl-Hexane           | C <sub>7</sub> H <sub>16</sub> | 100                     | 2.81 | 5.10    | 16.3    | 21.6   | 120     | 30.7    | 48.1   |
| 1,3-dimethyl-Cyclopentane | C <sub>7</sub> H <sub>14</sub> | 98                      | 2.99 | -       | -       | -      | -       | -       | 50.35  |
| Heptane                   | C <sub>7</sub> H <sub>16</sub> | 100                     | 3.11 | 4.26    | 13.2    | 17.9   | 79.1    | 24.9    | 55.4   |
| 2-methyl-(Z)-3-Hexene     | C <sub>7</sub> H <sub>14</sub> | 98                      | 3.19 | -       | -       | -      | 37.1    | 16.6    | 73.2   |
| 2-Heptene                 | C <sub>7</sub> H <sub>14</sub> | 98                      | 3.23 | -       | -       | -      | 10.2    | 3.08    | -      |
| 4-methyl-(E)-2-Hexene     | C <sub>7</sub> H <sub>14</sub> | 98                      | 3.29 | -       | -       | -      | 10.3    | 4.47    | 7.48   |
| 2,4-dimethyl-2-Pentene    | C <sub>7</sub> H <sub>14</sub> | 98                      | 3.36 | -       | -       | -      | 14.4    | 3.53    | 19.8   |
| methyl-Cyclohexane        | C <sub>7</sub> H <sub>14</sub> | 98                      | 3.49 | -       | -       | -      | 212     | 363     | 31.1   |
| Toluene                   | C <sub>7</sub> H <sub>8</sub>  | 92                      | 4.28 | 123     | 291     | 301    | 1106    | 824     | 604    |
| 3-methyl-Heptane          | C <sub>8</sub> H <sub>18</sub> | 114                     | 4.36 | -       | -       | -      | 31.6    | 28.2    | 26.6   |
| 2,4-dimethyl-Hexane       | C <sub>8</sub> H <sub>18</sub> | 114                     | 4.91 | -       | -       | -      | 30.5    | 7.60    | 16.8   |
| 2-Methyl-2-heptene        | C <sub>8</sub> H <sub>16</sub> | 112                     | 4.98 | -       | -       | -      | 7.43    | 5.42    | 4.43   |
| 1,2-dimethyl-Cyclohexene  | C <sub>8</sub> H <sub>14</sub> | 110                     | 5.15 | -       | -       | -      | 10.4    | 6.23    | 4.69   |
| Ethylbenzene              | C <sub>8</sub> H <sub>10</sub> | 106                     | 4.91 | 7.49    | 5.04    | 3.70   | 51.5    | 10.7    | 30.3   |
| p-Xylene                  | C <sub>8</sub> H <sub>10</sub> | 106                     | 6.45 | 46.9    | 47.9    | 6.16   | 327     | 94.6    | 204    |
| o-Xylene                  | C <sub>8</sub> H <sub>10</sub> | 106                     | 6.65 | 17.5    | 13.7    | 50.3   | 83.5    | 34.7    | 61.4   |
| 1-ethyl-2-methyl-benzene  | C <sub>9</sub> H <sub>12</sub> | 120                     | 7.3  | 3.37    | -       | 15.2   | 28.1    | 14.4    | 21.9   |
| 1,2,4-trimethyl-Benzene   | C <sub>9</sub> H <sub>12</sub> | 120                     | 9.46 | 3.50    | 2.55    | 1.65   | 15.8    | 17.6    | 17.7   |

**Table S6.** Identified compounds in liquid products of catalytic pyrolysis of BMP and CMP at 500, 550, and 600 °C, collected from the condenser. The units are mg compound / g liquid product.

| Compound Name                         | Formula                         | M <sup>+</sup><br>(m/z) | RT   | BMP 500 | BMP 550 | BMP600 | CMP 500 | CMP 550 | CMP600 |
|---------------------------------------|---------------------------------|-------------------------|------|---------|---------|--------|---------|---------|--------|
|                                       |                                 |                         | Min  | mg/g    | mg/g    | mg/g   | mg/g    | mg/g    | mg/g   |
| 3-methyl-pentane                      | C <sub>6</sub> H <sub>14</sub>  | 86                      | 2.24 | 4.76    | 121     | 247    | 53.5    | 142     | 286    |
| Hexane                                | C <sub>6</sub> H <sub>14</sub>  | 86                      | 2.33 | 5.79    | 50.6    | 987    | 39.9    | 152     | 276    |
| 3-methyl-(Z)-2-Pentene                | C <sub>6</sub> H <sub>12</sub>  | 84                      | 2.37 | 15.6    | 36.9    | 246    | 3.25    | 8.96    | 295    |
| 3-methyl-Cyclopentene                 | C <sub>6</sub> H <sub>10</sub>  | 84                      | 2.59 | 23.7    | 24.9    | 4.19   | 43.9    | 2.30    | 5.88   |
| 1,3-Hexadiene-5-yne                   | C <sub>6</sub> H <sub>6</sub>   | 78                      | 2.63 | 34.2    | 55.8    | 26.5   | 44.4    | 121     | 28.5   |
| Benzene                               | C <sub>6</sub> H <sub>6</sub>   | 78                      | 2.71 | 44.8    | 122     | 198    | 94.4    | 121     | 156    |
| 3-methyl-Hexane                       | C <sub>7</sub> H <sub>16</sub>  | 100                     | 2.81 | 13.8    | 424     | 59.9   | 28.6    | 40.4    | 18.4   |
| Heptane                               | C <sub>7</sub> H <sub>16</sub>  | 100                     | 3.11 | 16.5    | 89.5    | 31.2   | 21.3    | 21.5    | 33.5   |
| 3-methyl-(Z)-3-Hexene                 | C <sub>7</sub> H <sub>14</sub>  | 98                      | 3.18 | -       | -       | 11.0   | 21.3    | 11.2    | 24.1   |
| 4-methyl-(E)-2-Hexene                 | C <sub>7</sub> H <sub>14</sub>  | 98                      | 3.29 | -       | -       | 4.98   | 4.11    | 3.15    | 7.00   |
| 3,4-dimethyl-(E)-2-Pentene            | C <sub>7</sub> H <sub>14</sub>  | 98                      | 3.34 | -       | -       | 9.72   | 36.2    | 3.69    | 13.7   |
| methyl-Cyclohexane                    | C <sub>7</sub> H <sub>14</sub>  | 98                      | 3.48 | -       | -       | 4.59   | 46.58   | 5.46    | 11.0   |
| 2,5-dimethyl-Hexane                   | C <sub>8</sub> H <sub>18</sub>  | 114                     | 3.58 | -       | -       | 2.51   | 3.53    | 2.16    | 3.33   |
| 2,4-dimethyl-Hexane                   | C <sub>8</sub> H <sub>18</sub>  | 114                     | 3.61 | -       | -       | 3.71   | 6.63    | 5.29    | 8.75   |
| Toluene                               | C <sub>7</sub> H <sub>8</sub>   | 92                      | 4.28 | 370     | 707     | 3.97   | 13.8    | 217     | 805    |
| 3-methyl-Heptane                      | C <sub>8</sub> H <sub>18</sub>  | 114                     | 4.36 | -       | -       | 11.1   | 8.28    | 313     | 13.6   |
| 2-methyl-1-Heptene                    | C <sub>8</sub> H <sub>16</sub>  | 112                     | 4.65 | -       | -       | 9.80   | 64.6    | 57.7    | 13.8   |
| 1-ethyl-3-methyl-Cyclopentan          | C <sub>8</sub> H <sub>16</sub>  | 112                     | 4.75 | -       | -       | 3.04   | 43.9    | 39.2    | 4.27   |
| 2,3-dimethyl-2-Hexene                 | C <sub>8</sub> H <sub>16</sub>  | 112                     | 4.86 | 14.1    | 11.1    | 13.8   | 41.5    | 37.1    | 49.1   |
| 2,5-dimethyl-2-Hexene                 | C <sub>8</sub> H <sub>16</sub>  | 112                     | 4.96 | -       | -       | 1.01   | 11.4    | 57.8    | 10.5   |
| 2-Octene                              | C <sub>8</sub> H <sub>16</sub>  | 112                     | 5.05 | -       | -       | 8.83   | 46.4    | 41.5    | 12.4   |
| 4-Methyl-1,4-heptadiene               | C <sub>8</sub> H <sub>14</sub>  | 110                     | 5.13 | -       | -       | 2.14   | 8.08    | 98.1    | 14.9   |
| (Z)-3-Octene                          | C <sub>8</sub> H <sub>16</sub>  | 112                     | 5.24 | -       | -       | 0.99   | 40.2    | 1.32    | 9.00   |
| Octane                                | C <sub>8</sub> H <sub>18</sub>  | 114                     | 5.4  | 15.1    | 18.8    | 2.68   | 4.17    | 3.11    | 10.3   |
| 2,6-dimethyl-Heptane                  | C <sub>9</sub> H <sub>20</sub>  | 128                     | 5.56 | -       | -       | 1.89   | 3.49    | 2.26    | 8.84   |
| 2,5-dimethyl-Heptane                  | C <sub>9</sub> H <sub>20</sub>  | 128                     | 5.72 | 16.4    | 108     | 3.70   | 43.8    | 328     | 20.9   |
| cis-2-Nonene                          | C <sub>9</sub> H <sub>18</sub>  | 126                     | 5.89 | -       | -       | 9.61   | -       | -       | 13.5   |
| 2,6-dimethyl-3-Heptene                | C <sub>9</sub> H <sub>18</sub>  | 126                     | 5.98 | -       | -       | 4.84   | -       | -       | 6.81   |
| 2,2,3-trimethyl-Bicyclo[2.2.1]heptane | C <sub>10</sub> H <sub>18</sub> | 138                     | 6.13 | -       | -       | 5.55   | -       | -       | 7.80   |
| 1,1,2-trimethyl-Cyclohexane           | C <sub>9</sub> H <sub>18</sub>  | 126                     | 6.25 | -       | -       | 1.19   | 1.97    | 2.14    | 9.10   |
| Ethylbenzene                          | C <sub>8</sub> H <sub>10</sub>  | 106                     | 6.44 | 53.6    | 636     | 133    | 37.5    | 31.9    | 137    |
| p-Xylene                              | C <sub>8</sub> H <sub>10</sub>  | 106                     | 6.66 | 519     | 219     | 229    | 232     | 328     | 778    |
| 1-Nonene                              | C <sub>9</sub> H <sub>18</sub>  | 126                     | 7.2  | -       | -       | 23.5   | -       | -       | 32.9   |
| o-Xylene                              | C <sub>8</sub> H <sub>10</sub>  | 106                     | 7.29 | 176     | 47.5    | 76.7   | 39.5    | 77.9    | 277    |
| Nonane                                | C <sub>9</sub> H <sub>20</sub>  | 128                     | 7.42 | 12.8    | 16.7    | 8.16   | 7.50    | 11.2    | 47.8   |
| 2-Nonene, (E)-                        | C <sub>9</sub> H <sub>18</sub>  | 126                     | 7.6  | -       | -       | 15.5   | -       | 5.64    | 21.8   |
| cis-4-Nonene                          | C <sub>9</sub> H <sub>18</sub>  | 126                     | 7.95 | -       | -       | 3.75   | 1.04    | 36.7    | 5.27   |
| propyl-Benzene                        | C <sub>9</sub> H <sub>12</sub>  | 120                     | 9.01 | 7.57    | 118     | 4.90   | 4.46    | 12.7    | 27.4   |
| 1-ethyl-2-methyl-Benzene              | C <sub>9</sub> H <sub>12</sub>  | 120                     | 9.3  | 64.5    | 764     | 32.9   | 38.4    | 44.2    | 94.7   |
| 1-ethyl-4-methyl-Benzene              | C <sub>9</sub> H <sub>12</sub>  | 120                     | 9.33 | 30.7    | 100     | 11.8   | 13.1    | 10.2    | 42.9   |
| 1,2,4-trimethyl-Benzene               | C <sub>9</sub> H <sub>12</sub>  | 120                     | 9.5  | 92.7    | 22.9    | 38.2   | 56.04   | 105     | 102    |

| Compound Name                                              | Formula                         | M <sup>+</sup><br>(m/z) | RT   | BMP 500 | BMP 550 | BMP600 | CMP 500 | CMP 550 | CMP600 |
|------------------------------------------------------------|---------------------------------|-------------------------|------|---------|---------|--------|---------|---------|--------|
|                                                            |                                 |                         | Min  | mg/g    | mg/g    | mg/g   | mg/g    | mg/g    | mg/g   |
| 1,2,3-trimethyl-Benzene                                    | C <sub>9</sub> H <sub>12</sub>  | 120                     | 9.82 | 19.9    | 268     | 9.02   | 9.89    | 10.4    | 38.2   |
| Mesitylene                                                 | C <sub>9</sub> H <sub>12</sub>  | 120                     | 10.3 | 222     | 32.     | 94.9   | 131     | 181     | 169    |
| Decane                                                     | C <sub>10</sub> H <sub>22</sub> | 142                     | 10.4 | 5.92    | 49.8    | 8.09   | 5.21    | 18.2    | 26.1   |
| cis-4-Decene                                               | C <sub>10</sub> H <sub>20</sub> | 140                     | 10.6 | -       | -       | 5.73   | 86.5    | 77.3    | 81.1   |
| 1-ethyl-3-methyl-Benzene                                   | C <sub>9</sub> H <sub>12</sub>  | 120                     | 11.1 | 37.2    | 3.49    | 18.5   | 23.6    | 19.7    | 48.6   |
| Indane                                                     | C <sub>9</sub> H <sub>10</sub>  | 118                     | 11.5 | 1.61    | 80.1    | -      | -       | -       | -      |
| 1,3-diethyl-Benzene                                        | C <sub>10</sub> H <sub>14</sub> | 134                     | 11.9 | 2.44    | 22.9    | 2.12   | 1.96    | 2.40    | 14.5   |
| (1-methylpropyl)-Benzene                                   | C <sub>10</sub> H <sub>14</sub> | 134                     | 12.1 | 8.29    | 18.6    | 4.74   | 4.82    | 4.86    | 11.2   |
| 1-methyl-4-propyl-Benzene                                  | C <sub>10</sub> H <sub>14</sub> | 134                     | 12.1 | 29.4    | 283     | 10.9   | 2.26    | 4.41    | 20.85  |
| 4-ethyl-1,2-dimethyl-Benzene                               | C <sub>10</sub> H <sub>14</sub> | 134                     | 12.4 | 22.2    | 6.67    | 2.57   | 12.3    | 15.7    | 3.61   |
| 1-methyl-3-propyl-Benzene                                  | C <sub>10</sub> H <sub>14</sub> | 134                     | 12.7 | 9.26    | 19.8    | 5.69   | 2.10    | 1.45    | 15.2   |
| 2-ethyl-1,4-dimethyl-Benzene                               | C <sub>10</sub> H <sub>14</sub> | 134                     | 12.7 | 8.32    | 12. 5   | 5.41   | 7.61    | 1.19    | 13.1   |
| 1-methyl-3-(1-methylethyl)-Benzene                         | C <sub>10</sub> H <sub>14</sub> | 134                     | 12.8 | 10.7    | -       | 3.61   | 6.44    | 5.91    | 5.07   |
| 1,3,8-p-Menthatriene                                       | C <sub>10</sub> H <sub>14</sub> | 134                     | 12.9 | 19.1    | 24.1    | 10.4   | 12.1    | 10.8    | 24.5   |
| (E)-5-Undecene                                             | C <sub>11</sub> H <sub>22</sub> | 154                     | 13.1 | -       | -       | 17.2   | 1.29    | 33.2    | 24.2   |
| (Z)-4-Undecene                                             | C <sub>11</sub> H <sub>22</sub> | 154                     | 13.1 | -       | -       | 4.97   | 1.12    | 48.8    | 6.98   |
| Undecane                                                   | C <sub>11</sub> H <sub>24</sub> | 156                     | 13.3 | 1.52    | 39.9    | 7.83   | 5.93    | 9.53    | 26.3   |
| 1-ethyl-2,3-dimethyl- Benzene                              | C <sub>10</sub> H <sub>14</sub> | 134                     | 13.6 | 3.54    | 5.63    | 1.78   | 2.12    | 1.99    | 6.07   |
| 1,2,4,5-tetramethyl-benzene                                | C <sub>10</sub> H <sub>14</sub> | 134                     | 13.9 | 17.1    | 27.8    | 10.7   | 11.2    | 12.7    | 5.67   |
| 1,2,3,5-tetramethyl-Benzene                                | C <sub>10</sub> H <sub>14</sub> | 134                     | 14.1 | 20.6    | 35.5    | 13.7   | 14.23   | 16.8    | 19.8   |
| 2,3-dihydro-5-methyl-1H-Indene                             | C <sub>10</sub> H <sub>12</sub> | 132                     | 14.6 | -       | -       | 0.79   | 1.15    | 36.6    | 25.1   |
| 1,4-diethyl-2-methyl-Benzene                               | C <sub>11</sub> H <sub>16</sub> | 148                     | 14.7 | -       | -       | 1.60   | 2.04    | 2.06    | 10.71  |
| 1-methyl-4-(1-methylpropyl)-Benzene                        | C <sub>11</sub> H <sub>16</sub> | 148                     | 14.7 | -       | -       | 1.50   | 1.68    | 2.47    | 9.44   |
| 4-Methylindan                                              | C <sub>10</sub> H <sub>12</sub> | 132                     | 14.9 | 3.58    | 7.72    | 1.23   | 0.94    | 1.66    | 9.28   |
| 1-ethyl-3,5-dimethyl-Benzene                               | C <sub>10</sub> H <sub>14</sub> | 134                     | 14.9 | 1.79    | 18.4    | 5.68   | 6.36    | 5.80    | 14.8   |
| 4,4-Dimethyl-1,1a,3a,4,5,6-hexahydrocyclopropa[c]pentalene | C <sub>11</sub> H <sub>16</sub> | 148                     | 15.7 | -       | -       | 16.6   | 1.62    | 1.48    | 23.4   |
| Naphthalene                                                | C <sub>10</sub> H <sub>8</sub>  | 128                     | 16.2 | 14.8    | 53.6    | 8.07   | 12.7    | 11.5    | 22.9   |
| (Z)-3-Dodecene                                             | C <sub>12</sub> H <sub>24</sub> | 168                     | 17.3 | -       | -       | 1.79   | 26.5    | 23.7    | 2.52   |
| 1-ethyl-2,4,5-trimethyl-Benzene                            | C <sub>11</sub> H <sub>16</sub> | 148                     | 17.7 | 4.67    | 32.4    | 4.77   | 7.66    | 10.4    | 6.71   |
| 2,3-dihydro-2,2-Dimethylindene                             | C <sub>11</sub> H <sub>14</sub> | 146                     | 17.8 | 0.87    | 7.69    | -      | -       | -       | -      |
| Dodecane                                                   | C <sub>12</sub> H <sub>26</sub> | 170                     | 18.7 | 1.73    | 7.69    | 2.63   | 2.61    | 49.8    | 5.22   |
| pentamethyl-Benzene                                        | C <sub>11</sub> H <sub>16</sub> | 148                     | 18.8 | 18.9    | 5.18    | 10.4   | 2.88    | 53.9    | 14.7   |
| 1-methyl-Naphthalene                                       | C <sub>11</sub> H <sub>10</sub> | 142                     | 18.9 | 30.4    | 90.3    | 30.8   | 26.4    | 26.2    | 128    |
| 2-methyl-Naphthalene                                       | C <sub>11</sub> H <sub>10</sub> | 142                     | 19.5 | 13.7    | 36.4    | 12.8   | 8.31    | 9.98    | 61.7   |
| 1,2-dimethyl-Naphthalene                                   | C <sub>12</sub> H <sub>12</sub> | 156                     | 21.6 | 2.83    | 24.8    | 5.31   | 4.02    | 6.18    | 21.1   |
| 1,7-dimethyl-Naphthalene                                   | C <sub>12</sub> H <sub>12</sub> | 156                     | 21.9 | 16.9    | 27.6    | 12.3   | 10.9    | 10.6    | 34.4   |
| 1,5-dimethyl-Naphthalene                                   | C <sub>12</sub> H <sub>12</sub> | 156                     | 22.3 | 14.5    | 29. 1   | 13.1   | 9.76    | 9.52    | 35.4   |
| 2,6-dimethyl-Naphthalene                                   | C <sub>12</sub> H <sub>12</sub> | 156                     | 22.4 | 7.57    | 14.1    | 5.95   | 5.14    | 4.77    | 16.9   |
| 2,3-dimethyl-Naphthalene                                   | C <sub>12</sub> H <sub>12</sub> | 156                     | 22.8 | 4.91    | 10.6    | 3.91   | 2.69    | 3.03    | 12.2   |
| 1,8-dimethyl-Naphthalene                                   | C <sub>12</sub> H <sub>12</sub> | 156                     | 23.2 | 1.41    | 3.76    | 2.42   | 1.30    | 1.70    | 7.43   |
| 1,4-dimethyl-Naphthalene                                   | C <sub>12</sub> H <sub>12</sub> | 156                     | 23.9 | 2.08    | 6.63    | 9.86   | 1.85    | 2.42    | 13.9   |
| Tetradecane                                                | C <sub>14</sub> H <sub>30</sub> | 198                     | 24.2 | 31.7    | 10.6    | 3.11   | 2.29    | 4.49    | 14.9   |
| 1,4,5-trimethyl-Naphthalene                                | C <sub>13</sub> H <sub>14</sub> | 170                     | 24.9 | 2.09    | 18.2    | 3.35   | 1.86    | 1.77    | 5.37   |

| Compound Name                 | Formula                         | M <sup>+</sup><br>(m/z) | RT   | BMP 500 | BMP 550 | BMP600 | CMP 500 | CMP 550 | CMP600 |
|-------------------------------|---------------------------------|-------------------------|------|---------|---------|--------|---------|---------|--------|
|                               |                                 |                         | Min  | mg/g    | mg/g    | mg/g   | mg/g    | mg/g    | mg/g   |
| 1,6,7-trimethyl-Naphthalene   | C <sub>13</sub> H <sub>14</sub> | 170                     | 25.1 | 4.22    | 4.01    | 3.97   | 3.07    | 3.37    | 7.03   |
| 2,3,6-trimethyl-Naphthalene   | C <sub>13</sub> H <sub>14</sub> | 170                     | 25.4 | 4.09    | 7.23    | 2.90   | 3.54    | 3.32    | 6.28   |
| 1,4,6-trimethyl-Naphthalene   | C <sub>13</sub> H <sub>14</sub> | 170                     | 25.5 | 2.62    | 6.64    | 2.83   | 2.36    | 3.01    | 5.18   |
| 2-(1-methylethyl)-Naphthalene | C <sub>13</sub> H <sub>14</sub> | 170                     | 26.3 | 3.73    | 6.07    | 0.68   | 3.09    | 2.88    | 12.5   |
| 1-(1-methylethyl)-Naphthalene | C <sub>13</sub> H <sub>14</sub> | 170                     | 26.5 | 4.35    | 5.87    | 0.54   | 4.28    | 4.44    | 13.7   |
| Hexadecane                    | C <sub>16</sub> H <sub>34</sub> | 226                     | 28.8 | -       | -       | 2.30   | 1.37    | 3.58    | 13.1   |
| Octadecane                    | C <sub>18</sub> H <sub>38</sub> | 254                     | 30.9 | -       | -       | 1.53   | 1.79    | 2.31    | 25.5   |
| Nonadecane                    | C <sub>19</sub> H <sub>40</sub> | 268                     | 32.9 | -       | -       | 1.36   | 1.46    | 2.27    | 12.9   |
| Eicosane                      | C <sub>20</sub> H <sub>42</sub> | 282                     | 34.9 | -       | -       | 1.48   | 1.83    | 55.8    | 11.5   |
| 10-Heneicosene (c,t)          | C <sub>21</sub> H <sub>42</sub> | 294                     | 36.7 | -       | -       | 0.53   | 47.9    | 42.8    | 11.1   |
| Docosane                      | C <sub>22</sub> H <sub>46</sub> | 310                     | 38.5 | -       | -       | 10.5   | 35.9    | 32.1    | 14.7   |
| Tricosane                     | C <sub>23</sub> H <sub>48</sub> | 324                     | 40.2 | -       | -       | 5.88   | 39.1    | 34.8    | 8.25   |

**Table S7.** Carbon number partitioning of alkanes, olefins, aromatics, and oxygenated compounds in the thermal and catalytic pyrolysis products of BMP and CMP. Units are the number of carbons.

| Pyrolysis                | Sample Name | Alkanes           |     |       | Olefins |     |       | Aromatics |     |       | Oxygenated |     |       |
|--------------------------|-------------|-------------------|-----|-------|---------|-----|-------|-----------|-----|-------|------------|-----|-------|
|                          |             | Number of carbons |     |       |         |     |       |           |     |       |            |     |       |
|                          |             | Max               | Min | Range | Max     | Min | Range | Max       | Min | Range | Max        | Min | Range |
| Thermal<br><br>Catalytic | BMP500      | 44                | 7   | 38    | 42      | 7   | 36    | 10        | 10  | 1     | 30         | 6   | 25    |
|                          | BMP 550     | 44                | 7   | 38    | 42      | 7   | 36    | 10        | 10  | 1     | 30         | 6   | 25    |
|                          | BMP 600     | 44                | 8   | 37    | 44      | 7   | 38    | 10        | 10  | 1     | 30         | 3   | 28    |
|                          | BMP 500     | 14                | 6   | 9     | 10      | 6   | 5     | 13        | 6   | 8     |            |     |       |
|                          | BMP 550     | 14                | 6   | 9     | 10      | 6   | 5     | 13        | 6   | 8     |            |     |       |
|                          | BMP 600     | 12                | 6   | 7     | 10      | 6   | 5     | 14        | 6   | 9     |            |     |       |
| Thermal<br><br>Catalytic | CMP500      | 44                | 8   | 37    | 42      | 7   | 36    | 10        | 10  | 1     | 30         | 6   | 25    |
|                          | CMP 550     | 44                | 8   | 37    | 42      | 7   | 36    | 10        | 10  | 1     | 30         | 6   | 25    |
|                          | CMP 600     | 44                | 7   | 38    | 42      | 7   | 36    | 10        | 10  | 1     | 28         | 6   | 23    |
|                          | CMP 500     | 23                | 6   | 18    | 21      | 6   | 16    | 13        | 6   | 8     |            |     |       |
|                          | CMP 550     | 23                | 6   | 18    | 21      | 6   | 16    | 13        | 6   | 8     |            |     |       |
|                          | CMP 600     | 23                | 6   | 18    | 21      | 6   | 16    | 13        | 6   | 8     |            |     |       |

**Table S8.** Identified gas products of thermal pyrolysis of BMP and CMP at 500, 550, and 600 °C. The units are percent compound of total collected gas.

| Compound Name                     | Formula                         | M+  | RT    | BMP500 | BMP550 | BMP600 | CMP500 | CMP550 | CMP600 |
|-----------------------------------|---------------------------------|-----|-------|--------|--------|--------|--------|--------|--------|
|                                   |                                 |     | Min   | %      | %      | %      | %      | %      | %      |
| Carbon monoxide                   | CO                              | 28  | 1.09  | 84.9   | 69.8   | 21.0   | 52.3   | 9.86   | 12.3   |
| Methane                           | CH <sub>4</sub>                 | 16  | 1.18  | -      | 10.91  | -      | 8.19   | 1.78   | -      |
| Carbon dioxide                    | CO <sub>2</sub>                 | 44  | 1.45  | 0.33   | 0.33   | 7.64   | 5.16   | 0.82   | 0.51   |
| Ethylene                          | C <sub>2</sub> H <sub>4</sub>   | 28  | 2.03  | 2.82   | 3.96   | 6.18   | -      | 1.84   | 0.99   |
| Ethane                            | C <sub>2</sub> H <sub>6</sub>   | 30  | 2.59  | 1.28   | 2.19   | 2.89   | 1.75   | 0.88   | 0.40   |
| Propene                           | C <sub>3</sub> H <sub>6</sub>   | 42  | 9.32  | 3.70   | 4.68   | 21.70  | 4.79   | 10.36  | 7.40   |
| Propane                           | C <sub>3</sub> H <sub>8</sub>   | 44  | 10.07 | 0.77   | 0.49   | 2.64   | 0.27   | 1.10   | 0.76   |
| Acetaldehyde                      | C <sub>2</sub> H <sub>4</sub> O | 44  | 14.04 | -      | -      | -      | -      | -      | 0.51   |
| 1,3-Butadiene                     | C <sub>4</sub> H <sub>6</sub>   | 54  | 17.35 | -      | -      | 4.92   | 1.55   | 5.55   | 5.74   |
| Methylenecyclopropane             | C <sub>4</sub> H <sub>6</sub>   | 54  | 17.42 | 0.66   | 0.61   | 7.41   | 0.98   | -      | -      |
| 2-methyl-1-Propene                | C <sub>4</sub> H <sub>8</sub>   | 56  | 17.57 | 0.69   | 0.92   | 4.76   | 1.16   | 4.81   | 4.93   |
| 2-Butene                          | C <sub>4</sub> H <sub>8</sub>   | 56  | 17.82 | 0.46   | 0.71   | -      | -      | 7.59   | 7.96   |
| Butane                            | C <sub>4</sub> H <sub>10</sub>  | 58  | 18.31 | -      | -      | 0.73   | -      | 1.04   | 0.82   |
| 1-Butene                          | C <sub>4</sub> H <sub>8</sub>   | 56  | 18.46 | -      | -      | 1.29   | 0.31   | 1.01   | 1.04   |
| (Z)-2-Butene                      | C <sub>4</sub> H <sub>8</sub>   | 56  | 18.7  | -      | -      | 0.79   | -      | 0.55   | 0.75   |
| 2-Propenal                        | C <sub>3</sub> H <sub>4</sub> O | 56  | 21.03 | -      | -      | -      | -      | -      | 0.32   |
| Propanal                          | C <sub>3</sub> H <sub>6</sub> O | 58  | 21.67 | -      | -      | -      | 7.64   | 0.18   | 0.24   |
| 1,1-dimethyl-Cyclopropane         | C <sub>5</sub> H <sub>10</sub>  | 70  | 21.96 | -      | -      | -      | -      | 3.26   | 0.51   |
| 1,3-Pentadiene                    | C <sub>5</sub> H <sub>8</sub>   | 68  | 23.5  | -      | -      | 0.61   | 0.13   | 1.27   | 1.23   |
| ethyl-Cyclopropane                | C <sub>5</sub> H <sub>10</sub>  | 70  | 24.28 | 1.00   | 1.22   | 5.84   | 1.52   | 12.3   | 14.2   |
| Isoprene                          | C <sub>5</sub> H <sub>8</sub>   | 68  | 24.67 | -      | -      | 0.84   | 0.31   | 2.10   | 2.10   |
| 1-Pentene                         | C <sub>5</sub> H <sub>10</sub>  | 70  | 24.83 | -      | -      | -      | 0.40   | 11.2   | 10.0   |
| 3-methyl-1-Butene                 | C <sub>5</sub> H <sub>10</sub>  | 70  | 24.96 | 1.31   | 1.05   | 5.29   | -      | -      | -      |
| 1,4-Pentadiene                    | C <sub>5</sub> H <sub>8</sub>   | 68  | 25.79 | -      | -      | 0.87   | 0.63   | 2.86   | 3.01   |
| Cyclopentene                      | C <sub>5</sub> H <sub>8</sub>   | 68  | 25.81 | -      | 0.35   | 0.46   | -      | -      | -      |
| Pentane                           | C <sub>5</sub> H <sub>12</sub>  | 72  | 27.97 | -      | -      | -      | 10.9   | 1.46   | 1.55   |
| 3-methyl-(Z)-2-Pentene            | C <sub>6</sub> H <sub>12</sub>  | 84  | 28.96 | -      | -      | -      | -      | 0.88   | 1.29   |
| Bicyclo[3.1.0]hexane              | C <sub>6</sub> H <sub>10</sub>  | 82  | 29.51 | -      | -      | -      | -      | 0.93   | 0.94   |
| 2-methyl-1-Pentene                | C <sub>6</sub> H <sub>12</sub>  | 84  | 29.89 | -      | -      | -      | -      | 3.38   | 3.74   |
| ethyl-Cyclobutane                 | C <sub>6</sub> H <sub>12</sub>  | 84  | 30.01 | 0.67   | 1.02   | 1.04   | -      | -      | -      |
| 1-Hexene                          | C <sub>6</sub> H <sub>12</sub>  | 84  | 30.2  | -      | -      | -      | -      | 9.80   | 11.2   |
| 1-ethyl-2-methyl-cis-Cyclopropane | C <sub>6</sub> H <sub>12</sub>  | 84  | 30.41 | 1.39   | 1.76   | 2.63   | 1.41   | -      | -      |
| 2-ethyl-1,3-Butadiene             | C <sub>6</sub> H <sub>10</sub>  | 82  | 30.91 | -      | -      | -      | -      | 0.57   | 0.61   |
| Benzene                           | C <sub>6</sub> H <sub>6</sub>   | 78  | 31.51 | -      | -      | 0.46   | 0.65   | 1.18   | 1.53   |
| 1,2-Cyclononadiene                | C <sub>9</sub> H <sub>14</sub>  | 122 | 32.13 | -      | -      | -      | -      | -      | 1.20   |
| (Z)-1,4-Hexadiene                 | C <sub>6</sub> H <sub>10</sub>  | 82  | 32.39 | -      | -      | -      | -      | 0.53   | 0.81   |
| (E)-1,3-Pentadiene, 2-methyl-     | C <sub>6</sub> H <sub>10</sub>  | 82  | 32.69 | -      | -      | -      | -      | 0.65   | 0.97   |
| trans-1,4-Hexadiene               | C <sub>6</sub> H <sub>10</sub>  | 82  | 34.3  | -      | -      | -      | -      | 0.30   | 0.41   |



**Table S9.** FTIR band and functional group table of thermal and catalytic pyrolysis of BMP and CMP chars at 500, 550, and 600 °C.

| Bond/ Functional Group                                                             | Thermal           |       |        | Catalytic |        |        | Thermal  |        |        | Catalytic |        |        |
|------------------------------------------------------------------------------------|-------------------|-------|--------|-----------|--------|--------|----------|--------|--------|-----------|--------|--------|
|                                                                                    | BMP Char          |       |        | BMP Char  |        |        | CMP Char |        |        | CMP Char  |        |        |
|                                                                                    | 500°C             | 550°C | 600 °C | 500°C     | 550 °C | 600 °C | 500 °C   | 550 °C | 600 °C | 500 °C    | 550 °C | 600 °C |
|                                                                                    | wavenumber (cm-1) |       |        |           |        |        |          |        |        |           |        |        |
| aromatic C–H stretching vibrations                                                 | -                 | -     | -      | 645       | 645    | -      | 650      | 657    | 657    | 650       | -      | 655    |
| =C–H Bend (Alkene)                                                                 | 713               | 718   | 715    | -         | -      | -      | -        | 713    | -      | 714       | 716    | 714    |
| =C–H Bending alkene                                                                | -                 | -     | -      | -         | -      | -      | 798      | 798    | 798    | 799       | 798    | 797    |
| C–O–C stretching, cellulose, hemicellulose                                         | 873               | 874   | 874    | 874       | 874    | 874    | 874      | 874    | 874    | 875       | 874    | 874    |
| C–O stretching, aromatic C–H in plane deformation, Cellulose, Lignin               | 1024              | 1045  | 1044   | 1045      | 10451  | 1045   | 1060     | 1053   | 1045   | 1059      | 1053   | 1056   |
| C–H bending, C–H stretching in CH <sub>3</sub> , cellulose, hemicellulose, lignin  | 1395              | 1398  | 1398   | -         | -      | -      | -        | -      | -      | -         | -      | -      |
| Symmetric CH <sub>2</sub> bending vibration, symmetric stretching band, cellulose, | 1416              | 1409  | 1417   | 1417      | 1417   | 1417   | 1416     | 1417   | 1416   | 1417      | 1423   | 1417   |
| C=C–C aromatic ring stretching and vibration, lignin                               | 1568              | 1573  | 1574   | -         | 1582   | -      | 1584     | 1584   | 184    | -         | -      | -      |
| C–H stretching cellulose, hemicellulose, lignin                                    | 2914              | 2915  | -      | 2914      | 2916   | -      | 2916     | 2914   | 2916   | 2913      | 2914   | -      |

**Table S10.** FTIR band and functional group table of bluegrass (BG), net wrap (NW), twine 1 (T1), twine 2 (T2), mixed plastic (MP), chaff mixed plastic (CMP), bluegrass mixed plastic (BMP).

| Bond/ Functional Group                                                | Raw Materials                  |       |      |      |      | Mix Materials |      |      |
|-----------------------------------------------------------------------|--------------------------------|-------|------|------|------|---------------|------|------|
|                                                                       | BG                             | Chaff | NW   | T1   | T2   | MP            | CMP  | BMP  |
|                                                                       | wavenumber (cm <sup>-1</sup> ) |       |      |      |      |               |      |      |
| =C–H Bend (Alkene)                                                    | -                              | -     | 717  | 719  | -    | 718           | 717  | 717  |
| Aliphatic CH <sub>2</sub> Rocking                                     | -                              | -     | 730  | -    | -    | 730           | 730  | 730  |
| Aromatic Out of plane C–H bending                                     | -                              | -     | -    | 808  | 808  | 810           | 808  | -    |
| =C–H Bending Alkene                                                   | -                              | -     | -    | 899  | 898  | 900           | -    | -    |
| CH <sub>2</sub> wagging or twisting                                   | -                              | -     | -    | 972  | 972  | 973           | -    | -    |
| =C–H bend alkenes                                                     | -                              | -     | -    | 998  | 997  | 997           | -    | -    |
| aromatic C–H in-plane deformation                                     | -                              | 1031  | 1034 | -    | -    | -             | 1032 | 1034 |
| C–C–H bending                                                         | 1132                           | -     | -    | 1101 | 1102 | -             | -    | -    |
| C–O–C stretching, cellulose, hemicellulose                            | 1160                           | 1157  | -    | -    | -    | -             | 1164 | 1165 |
| C–H in-plane bending                                                  | 1239                           | 1231  | -    | -    | -    | -             | -    | -    |
| CH <sub>3</sub> Symmetric bending                                     | 1369                           | 1372  | 1376 | 1375 | 1375 | 1375          | 1375 | 1376 |
| C–H in-plane wagging                                                  | -                              | -     | 1461 | 1455 | 1454 | 1462          | 1462 | 1465 |
| –CH <sub>3</sub> Bending                                              | -                              | -     | 1471 | -    | -    | 1472          | 1471 | 1472 |
| –C=C– stretch alkene                                                  | -                              | 1634  | -    | 1650 | 1650 | -             | 1620 | -    |
| C=O stretch, $\alpha$ , $\beta$ –unsaturated esters                   | 1731                           | 1731  | -    | -    | -    | -             | 1729 | 1729 |
| C–H symmetrical stretching from CH <sub>2</sub> from aliphatic chain  | 2850                           | 2850  | 2848 | 2838 | 2837 | 2848          | 2848 | 2848 |
| C–H Stretch Methyl (–CH <sub>3</sub> )                                | -                              | -     | -    | -    | 2866 | 2866          | -    | -    |
| C–H asymmetrical stretching from CH <sub>2</sub> from aliphatic chain | 2919                           | 2920  | 2914 | 2916 | 2916 | 2915          | 2915 | 2919 |
| C–H asymmetrical stretching from CH <sub>3</sub> from aliphatic chain | -                              | -     | -    | 2949 | 2949 | 2951          | 2952 | 2951 |
| O–H stretching vibration, H–bonded, (alcohols, phenols)               | 3347                           | 3346  | 3346 | -    | -    | -             | 3337 | 3380 |

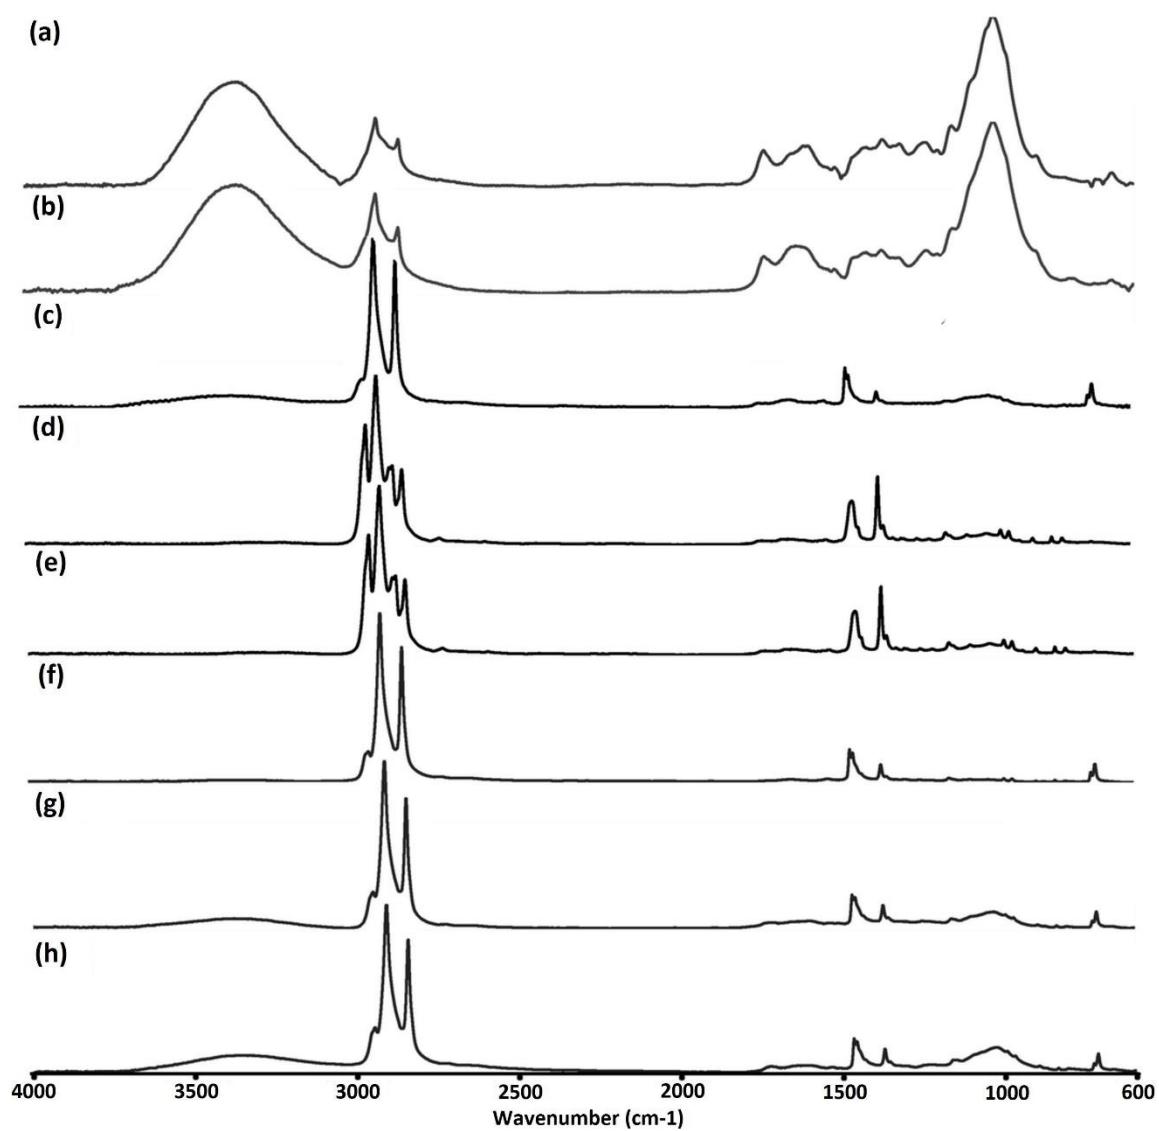

**Figure S6.** FTIR spectra of (a) bluegrass (BG), (b) chaff, (c) net wrap (NW), (d) twine 1 (T1), (e) twine 2 (T2), (f) mixed plastic (MP), (g) chaff mixed plastic (CMP), and (h) bluegrass mixed plastic (BMP).

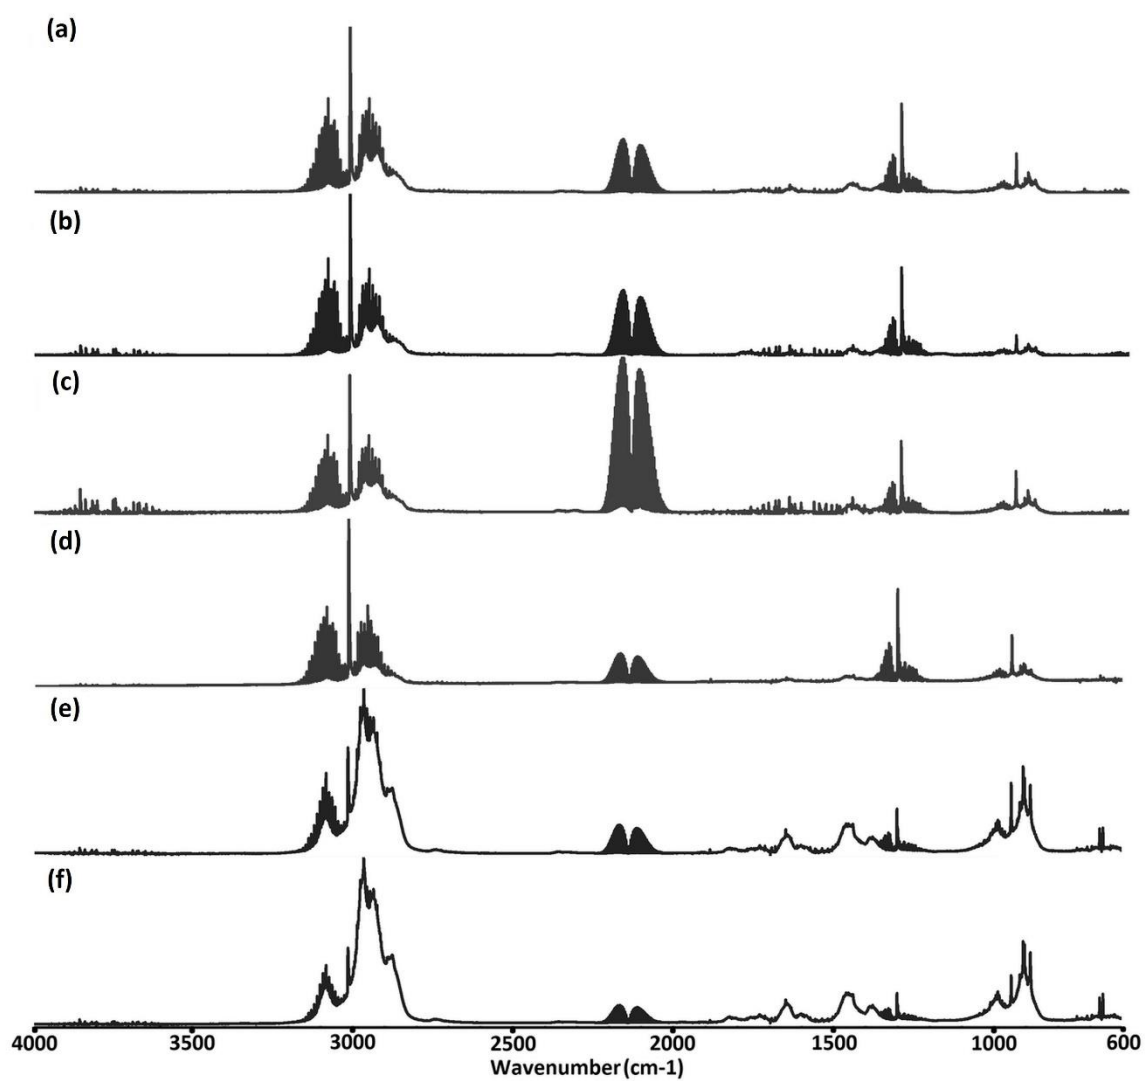

**Figure S7.** FTIR spectra of gas produced from the thermal pyrolysis of BMP at (a) 500 °C, (b) 550 °C, (c) 600 °C, and CMP at (d) 500 °C, (e) 550 °C, and (f) 600 °C.

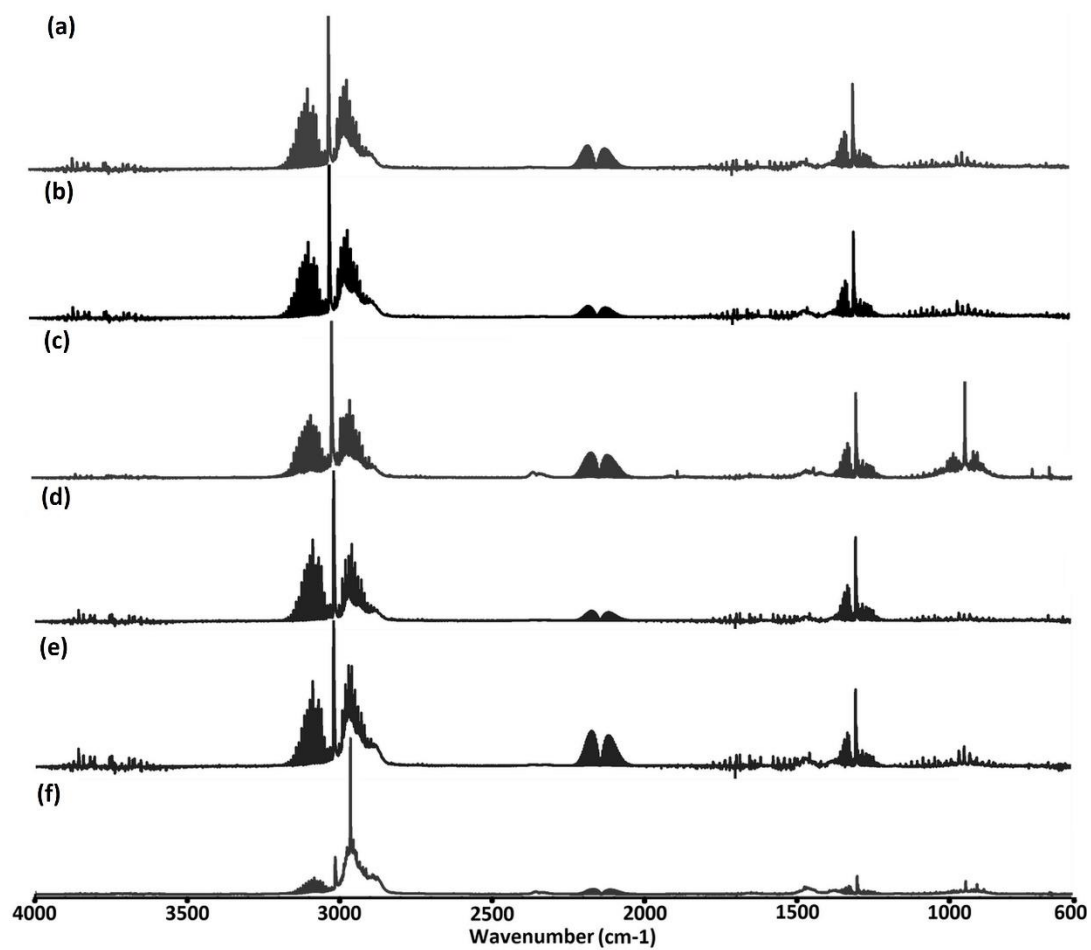

**Figure S8.** Gas FTIR spectra of catalytic pyrolysis of BMP at (a) 500 °C, (b) 550 °C, (c) 600 °C, and CMP at (d) 500 °C, (e) 550 °C, (f) 600 °C.

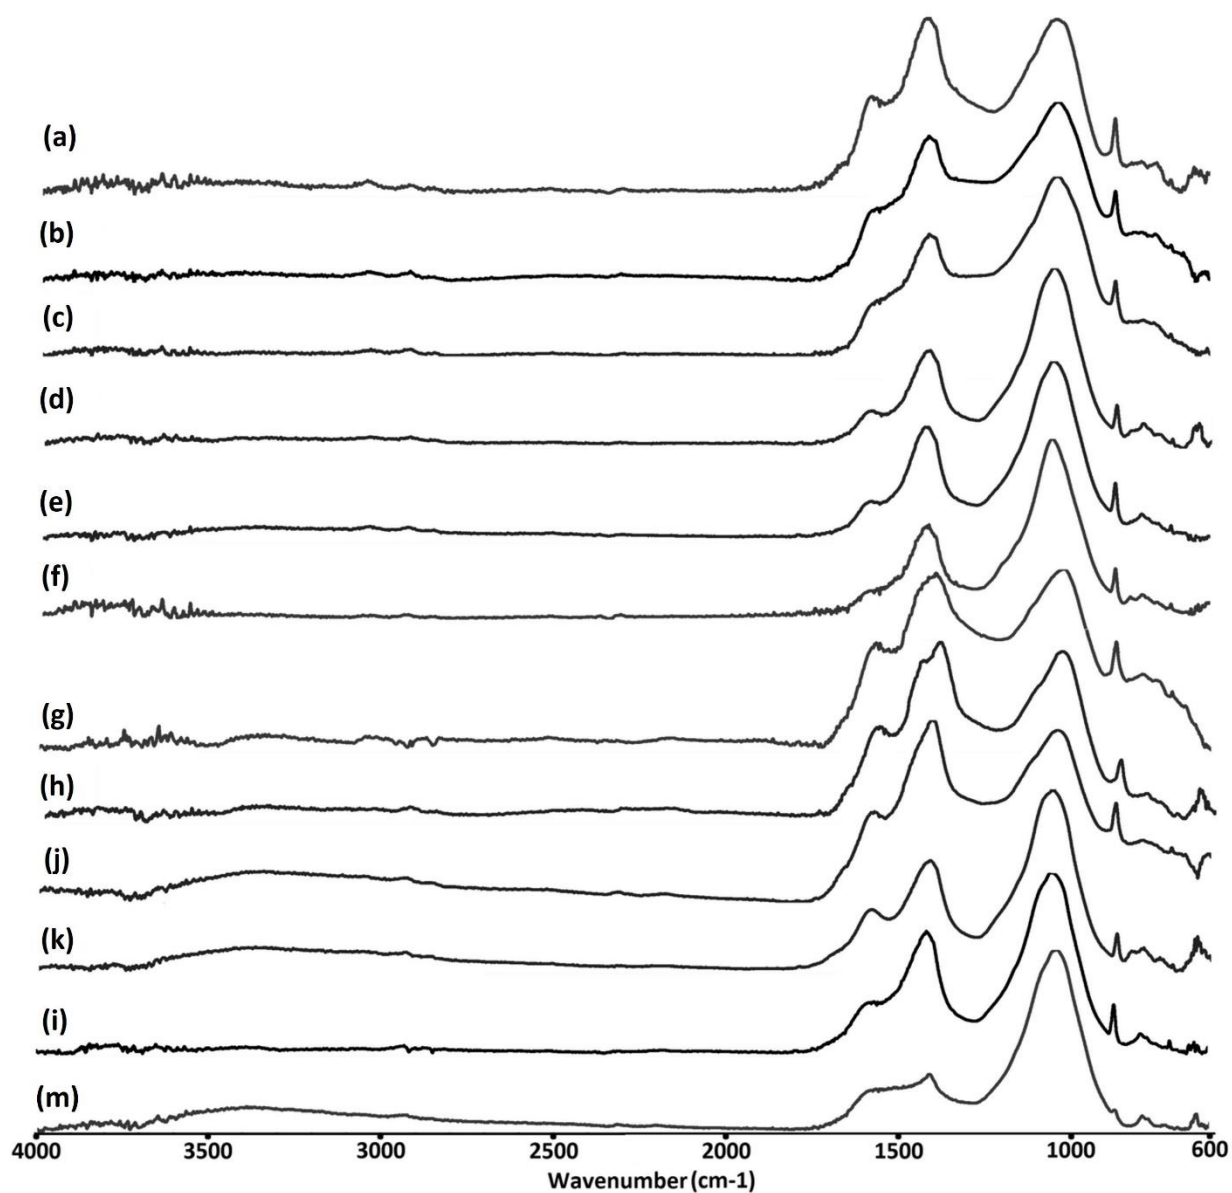

**Figure S9.** FTIR spectra of char from thermal pyrolysis of: BMP at (a) 500 °C, (b) 550 °C, (c) 600 °C; catalytic pyrolysis of BMP at (d) 500 °C, (e) 550 °C, (f) 600 °C; thermal pyrolysis of CMP at (g) 500 °C, (h) 550 °C, (j) 600 °C; and catalytic pyrolysis of CMP at (k) 500 °C, (l) 550 °C, and (m) 600 °C.
